# Supplementary material
Source: MDPI journal article supplement (https://www.mdpi.com/2075-163X/12/7/861)
Supplement: s1 [file s1]

Supplementary material.

Table S1. Elemental analyses of the Savinja and Voglajna Rivers stream and alluvial sediments.

|                | LON        | LAT        | DEPTH (cm) | ANALYTICS                 | PARTICLE SIZE (mm) | Mo    | Cu     | Pb      | Zn     | Ag     | Ni    | Co    | Mn    | Fe    | As    | U     | Th    | Sr    | Cd    | Sb    | Bi    | V     | Ca    | P      | La    |
|----------------|------------|------------|------------|---------------------------|--------------------|-------|--------|---------|--------|--------|-------|-------|-------|-------|-------|-------|-------|-------|-------|-------|-------|-------|-------|--------|-------|
|                |            |            |            |                           |                    | mg/kg | mg/kg  | mg/kg   | mg/kg  | mg/kg  | mg/kg | mg/kg | mg/kg | %     | mg/kg | %     | %      | mg/kg |
| S01 SS         | 14,6476474 | 46,4194598 | 0          | ACME, 2019, ICP total dig | < 0.063            | 0,69  | 24,3   | 20,74   | 69,4   | 0,969  | 32,2  | 14    | 545   | 2,98  | 15,4  | 2,2   | 9,5   | 127   | 0,14  | 1,93  | 0,28  | 95    | 6,69  | 0,049  | 27,2  |
| S02 SS         | 14,7274470 | 46,3795956 | 0          | ACME, 2019, ICP total dig | < 0.063            | 0,67  | 19,6   | 15,56   | 75,7   | 0,072  | 24,2  | 10,7  | 502   | 2,23  | 9,4   | 1,6   | 6,1   | 171   | 0,31  | 1,19  | 0,18  | 64    | 11,91 | 0,035  | 17,4  |
| S03 SS         | 14,7387350 | 46,3595111 | 0          | ACME, 2019, ICP total dig | < 0.063            | 0,9   | 20,1   | 18,2    | 68,2   | 0,074  | 28,4  | 12,2  | 536   | 2,67  | 11,7  | 1,8   | 7,1   | 176   | 0,18  | 1,45  | 0,22  | 74    | 10,57 | 0,04   | 22,9  |
| S04 SS         | 14,7488684 | 46,3552343 | 0          | ACME, 2019, ICP total dig | < 0.063            | 0,6   | 17,8   | 12,61   | 64,2   | 0,181  | 22,1  | 10,5  | 540   | 2,2   | 8,4   | 1,6   | 5,2   | 158   | 0,21  | 0,99  | 0,16  | 58    | 13,02 | 0,038  | 15,5  |
| S05 SS         | 14,8053260 | 46,3621756 | 0          | ACME, 2019, ICP total dig | < 0.063            | 0,61  | 17,6   | 12,76   | 57,6   | 0,102  | 22,9  | 10,7  | 541   | 2,21  | 7,3   | 1,6   | 5,6   | 159   | 0,16  | 1,02  | 0,14  | 66    | 11,73 | 0,034  | 19,1  |
| S06 SS         | 14,8343532 | 46,3397145 | 0          | ACME, 2019, ICP total dig | < 0.063            | 0,63  | 16,7   | 16,24   | 54,1   | 0,138  | 24,8  | 9,7   | 590   | 2,09  | 7,6   | 1,6   | 5,6   | 173   | 0,17  | 1,16  | 0,18  | 63    | 12,87 | 0,035  | 15,9  |
| S07 SS         | 14,8870108 | 46,3104630 | 0          | ACME, 2019, ICP total dig | < 0.063            | 0,65  | 18,4   | 13,86   | 63,4   | 0,108  | 26,8  | 10,1  | 579   | 2,32  | 9     | 1,7   | 6,2   | 151   | 0,18  | 1,02  | 0,19  | 68    | 11,4  | 0,036  | 18,3  |
| S08 SS         | 14,9254488 | 46,3128814 | 0          | ACME, 2019, ICP total dig | < 0.063            | 0,55  | 17,2   | 12,4    | 54,1   | 0,089  | 25,8  | 9,5   | 507   | 2,28  | 7,6   | 1,6   | 6,2   | 156   | 0,11  | 0,96  | 0,17  | 69    | 10,85 | 0,035  | 18,4  |
| S09 SS         | 14,9651475 | 46,3369110 | 0          | ACME, 2019, ICP total dig | < 0.063            | 0,59  | 17,7   | 25,15   | 82,6   | 0,064  | 25,7  | 10,4  | 560   | 2,52  | 11,1  | 2,6   | 11,3  | 101   | 0,39  | 1,12  | 0,29  | 63    | 4,58  | 0,049  | 32,2  |
| S10 SS         | 15,0172568 | 46,3172106 | 0          | ACME, 2019, ICP total dig | < 0.063            | 0,59  | 15,3   | 18,19   | 58,7   | 0,084  | 24,7  | 9,4   | 605   | 2,3   | 9     | 2     | 8     | 131   | 0,21  | 1,75  | 0,2   | 64    | 8,75  | 0,039  | 24    |
| S11 SS         | 15,0800962 | 46,2648267 | 0          | ACME, 2019, ICP total dig | < 0.063            | 0,87  | 20,9   | 19,39   | 76,6   | 0,086  | 31    | 12,4  | 658   | 2,68  | 7     | 2,2   | 8,4   | 146   | 0,3   | 0,98  | 0,21  | 73    | 7,8   | 0,052  | 28,3  |
| S12 SS         | 15,1413873 | 46,2385786 | 0          | ACME, 2019, ICP total dig | < 0.063            | 0,8   | 30,5   | 30,26   | 105,3  | 0,068  | 47,4  | 16,1  | 920   | 3,25  | 13,2  | 1,9   | 9,9   | 114   | 0,35  | 1,5   | 0,39  | 85    | 3,99  | 0,061  | 23,3  |
| S13 SS         | 15,2262118 | 46,2333114 | 0          | ACME, 2019, ICP total dig | < 0.063            | 1,16  | 35,5   | 33,19   | 111,2  | 0,085  | 51    | 17,3  | 877   | 3,77  | 12,4  | 2,1   | 9,8   | 120   | 0,49  | 1,9   | 0,42  | 100   | 3,6   | 0,073  | 23,5  |
| S14 SS         | 15,2665229 | 46,2243699 | 0          | ACME, 2019, ICP total dig | < 0.063            | 0,84  | 32,6   | 33,03   | 120,4  | 0,079  | 45,7  | 15,5  | 898   | 3,15  | 12,1  | 1,6   | 9     | 124   | 0,47  | 1,63  | 0,39  | 85    | 4,59  | 0,057  | 22,4  |
| S15 SS         | 15,2644737 | 46,2188428 | 0          | ACME, 2019, ICP total dig | < 0.063            | 1,4   | 38,7   | 48,17   | 270,1  | 0,177  | 40,5  | 23,8  | 998   | 2,74  | 11,8  | 2,3   | 9,8   | 146   | 1,81  | 3,59  | 0,63  | 71    | 4,75  | 0,072  | 32    |
| S16 SS         | 15,2380028 | 46,2017385 | 0          | ACME, 2019, ICP total dig | < 0.063            | 1,27  | 41,7   | 40,72   | 214,4  | 0,107  | 49,2  | 18,6  | 995   | 3,19  | 11,1  | 1,3   | 7,2   | 126   | 1,99  | 2,86  | 0,63  | 84    | 3,79  | 0,081  | 18,5  |
| S17 SS         | 15,2311504 | 46,1922087 | 0          | ACME, 2019, ICP total dig | < 0.063            | 1,11  | 34,9   | 37,81   | 164,3  | 0,079  | 44,4  | 17,5  | 944   | 3,07  | 10,8  | 2     | 10,2  | 123   | 1,19  | 2,21  | 0,53  | 81    | 4,2   | 0,079  | 24,9  |
| S18 SS         | 15,2333465 | 46,1642652 | 0          | ACME, 2019, ICP total dig | < 0.063            | 1,04  | 33,3   | 32,035  | 158,9  | 0,132  | 42,9  | 14,95 | 795   | 3,135 | 10,65 | 2,45  | 10,95 | 138   | 1,18  | 2,08  | 0,495 | 79,5  | 4,685 | 0,0795 | 30,7  |
| S19 SS         | 15,2391988 | 46,1464779 | 0          | ACME, 2019, ICP total dig | < 0.063            | 1,26  | 33,95  | 34,485  | 162,55 | 0,1215 | 42,9  | 15,55 | 947,5 | 3,165 | 10,95 | 1,9   | 10,2  | 131,5 | 1,125 | 2,2   | 0,56  | 79,5  | 4,415 | 0,08   | 25,75 |
| S20 SS         | 15,1964927 | 46,1333611 | 0          | ACME, 2019, ICP total dig | < 0.063            | 1,02  | 23,6   | 34,46   | 111,2  | 0,091  | 29,8  | 11,2  | 696   | 2,51  | 8,4   | 2,3   | 9,3   | 194   | 0,58  | 1,5   | 0,53  | 61    | 7,56  | 0,068  | 26,7  |
| S21 SS         | 15,2109464 | 46,1213672 | 0          | ACME, 2019, ICP total dig | < 0.063            | 1,2   | 39,4   | 36,47   | 156,4  | 0,094  | 52,5  | 18,1  | 821   | 3,56  | 13,5  | 2,3   | 10,6  | 153   | 1,16  | 2,08  | 0,46  | 87    | 4,61  | 0,091  | 29,6  |
| S22 SS         | 15,2190421 | 46,1088638 | 0          | ACME, 2019, ICP total dig | < 0.063            | 1,085 | 30,5   | 30,385  | 139,1  | 0,1235 | 43,65 | 14,6  | 858   | 2,98  | 10,75 | 2,4   | 10,75 | 172   | 0,735 | 1,73  | 0,395 | 81    | 6,13  | 0,0725 | 30,95 |
| S23 SS         | 15,1896904 | 46,0893339 | 0          | ACME, 2019, ICP total dig | < 0.063            | 0,99  | 27,3   | 30,43   | 116,8  | 0,095  | 42,1  | 13,8  | 809   | 2,855 | 8,05  | 2,3   | 9,6   | 172   | 0,72  | 1,53  | 0,355 | 73    | 6,05  | 0,0685 | 30,9  |
| VO 01          | 15,2689241 | 46,2262241 | 0          | ACME, 2019, ICP total dig | < 0.063            | 1,54  | 60,5   | 88,93   | 521,9  | 0,202  | 40,6  | 37,5  | 744   | 2,77  | 15,1  | 2,3   | 10,3  | 159   | 3,72  | 7,21  | 0,72  | 68    | 6,07  | 0,084  | 33,1  |
| VO 02          | 15,2961213 | 46,2298470 | 0          | ACME, 2019, ICP total dig | < 0.063            | 2,235 | 29,15  | 34,685  | 154,9  | 0,1335 | 34,4  | 13,05 | 2406  | 2,7   | 8,8   | 2,4   | 10,45 | 230,5 | 0,685 | 1,805 | 0,39  | 50    | 8,585 | 0,0935 | 31,8  |
| VO 03          | 15,3098684 | 46,2235666 | 0          | ACME, 2019, ICP total dig | < 0.063            | 2,04  | 30,6   | 39,0    | 188,3  | 0,122  | 39,5  | 11,4  | 928   | 2,95  | 8,17  | 1,97  | 10,4  | 156   | 0,65  | 1,49  | 0,44  | 67    | 3,93  | 0,0773 | 31,8  |
| VO 04          | 15,3353340 | 46,2189141 | 0          | ACME, 2019, ICP total dig | < 0.063            | 0,69  | 13,6   | 21,76   | 81,1   | 0,045  | 24,6  | 8,9   | 655   | 2,27  | 6,6   | 2,8   | 16,6  | 151   | 0,28  | 0,9   | 0,16  | 53    | 2,81  | 0,056  | 53,5  |
| VO 05          | 15,3688911 | 46,2123988 | 0          | ACME, 2019, ICP total dig | < 0.063            | 0,79  | 22,5   | 19,21   | 91,7   | 0,037  | 34,3  | 10,8  | 747   | 2,55  | 8     | 1,7   | 9,3   | 153   | 0,32  | 1     | 0,18  | 64    | 3,32  | 0,07   | 27,8  |
| VO 06          | 15,4027925 | 46,2133318 | 0          | ACME, 2019, ICP total dig | < 0.063            | 0,68  | 14,7   | 16,82   | 64,4   | 0,01   | 31,5  | 9,4   | 685   | 2,33  | 5,9   | 2,4   | 14,7  | 141   | 0,28  | 0,81  | 0,13  | 63    | 2,22  | 0,053  | 48,3  |
| VO 07          | 15,4177292 | 46,1990553 | 0          | ACME, 2019, ICP total dig | < 0.063            | 0,53  | 11,05  | 14,615  | 47,7   | 0,0285 | 25,8  | 8,2   | 794,5 | 1,955 | 6,8   | 2,65  | 14,45 | 148,5 | 0,165 | 0,725 | 0,12  | 50    | 1,955 | 0,0515 | 46,4  |
| SP01 0-20cm    | 15,2157203 | 46,2329958 | -10        | ACME, 2019, ICP total dig | < 0.063            | 0,78  | 25,2   | 40,31   | 168    | 0,093  | 40,5  | 13,3  | 740   | 2,87  | 9,4   | 2,5   | 9,2   | 138   | 1,3   | 1,5   | 0,3   | 73    | 5,86  | 0,059  | 28,8  |
| SP01 20-40cm   | 15,2157203 | 46,2329958 | -30        | ACME, 2019, ICP total dig | < 0.063            | 0,77  | 24,7   | 37,45   | 164,7  | 0,111  | 38,8  | 12    | 756   | 2,94  | 9,2   | 2     | 8,1   | 148   | 1,78  | 1,04  | 0,24  | 82    | 7,23  | 0,046  | 25    |
| SP01 40-60cm   | 15,2157203 | 46,2329958 | -50        | ACME, 2019, ICP total dig | < 0.063            | 0,72  | 22,1   | 27,9    | 122,8  | 0,106  | 38,9  | 12,4  | 687   | 2,8   | 8,9   | 2     | 8     | 146   | 0,97  | 0,98  | 0,21  | 79    | 8,36  | 0,045  | 23,6  |
| SP01 60-80cm   | 15,2157203 | 46,2329958 | -70        | ACME, 2019, ICP total dig | < 0.063            | 0,75  | 23,2   | 26,51   | 103    | 0,118  | 45,2  | 13,3  | 680   | 2,81  | 8,5   | 2,2   | 7,9   | 151   | 0,74  | 1,08  | 0,24  | 79    | 8,34  | 0,045  | 24,4  |
| SP01 80-100cm  | 15,2157203 | 46,2329958 | -90        | ACME, 2019, ICP total dig | < 0.063            | 0,68  | 21     | 26      | 88,2   | 0,124  | 36,1  | 11,1  | 635   | 2,7   | 8,6   | 2     | 7,5   | 141   | 0,36  | 1,06  | 0,23  | 74    | 8,37  | 0,041  | 23,4  |
| SP02 0-20cm    | 15,2399218 | 46,1970703 | -10        | ACME, 2019, ICP total dig | < 0.063            | 0,75  | 21,7   | 28,99   | 98,6   | 0,094  | 35,7  | 11,3  | 639   | 2,64  | 7,9   | 2,2   | 9,3   | 152   | 0,37  | 1,05  | 0,29  | 66    | 7,22  | 0,057  | 25,3  |
| SP02 20-40cm   | 15,2399218 | 46,1970703 | -30        | ACME, 2019, ICP total dig | < 0.063            | 0,8   | 27,1   | 32,44   | 115    | 0,117  | 45,3  | 14,1  | 733   | 2,9   | 8,8   | 2,5   | 10,1  | 145   | 0,5   | 1,17  | 0,28  | 75    | 6,65  | 0,055  | 28,9  |
| SP02 40-60cm   | 15,2399218 | 46,1970703 | -50        | ACME, 2019, ICP total dig | < 0.063            | 0,81  | 25,6   | 27,93   | 99,9   | 0,107  | 46    | 13,2  | 728   | 2,87  | 9,6   | 2,2   | 8,8   | 147   | 0,38  | 1,1   | 0,25  | 73    | 7,82  | 0,052  | 27,3  |
| SP02 60-80cm   | 15,2399218 | 46,1970703 | -70        | ACME, 2019, ICP total dig | < 0.063            | 0,87  | 38,8   | 57,46   | 201    | 0,151  | 50,2  | 15    | 778   | 3,1   | 18,2  | 2,4   | 10,2  | 152   | 0,87  | 1,6   | 0,35  | 74    | 6,67  | 0,061  | 28    |
| SP02 80-100cm  | 15,2399218 | 46,1970703 | -90        | ACME, 2019, ICP total dig | < 0.063            | 0,93  | 43,6   | 67,76   | 221,1  | 0,192  | 47,9  | 13,2  | 769   | 3,09  | 22,2  | 2,3   | 9,9   | 149   | 1,11  | 1,65  | 0,34  | 77    | 6,2   | 0,057  | 30,3  |
| SP02 100-120cm | 15,2399218 | 46,1970703 | -110       | ACME, 2019, ICP total dig | < 0.063            | 0,89  | 31,9   | 59,8    | 182,2  | 0,148  | 48,6  | 13,3  | 716   | 2,88  | 12,3  | 2,3   | 9,5   | 141   | 0,94  | 1,61  | 0,31  | 72    | 6,07  | 0,046  | 27,5  |
| SP02 120-140cm | 15,2399218 | 46,1970703 | -130       | ACME, 2019, ICP total dig | < 0.063            | 0,84  | 30,6   | 65,7    | 204    | 0,153  | 46,2  | 13,2  | 699   | 2,92  | 13,7  | 2,5   | 10,3  | 138   | 1,03  | 1,85  | 0,38  | 74    | 6,15  | 0,054  | 31,3  |
| VP01 0-20cm    | 15,2708857 | 46,2306173 | -10        | ACME, 2019, ICP total dig | < 0.063            | 1,38  | 122,9  | 269,74  | 1686,6 | 1,182  | 42,4  | 17,9  | 700   | 3,02  | 27,5  | 2,3   | 10,7  | 136   | 4,89  | 3,94  | 0,5   | 69    | 4,4   | 0,078  | 34,1  |
| VP01 20-40cm   | 15,2708857 | 46,2306173 | -30        | ACME, 2019, ICP total dig | < 0.063            | 1,14  | 74,9   | 178,12  | 1285,7 | 0,489  | 52,1  | 13,5  | 892   | 3,07  | 19,3  | 2,4   | 10,2  | 111   | 4,36  | 2,78  | 0,4   | 83    | 4,85  | 0,062  | 30    |
| VP01 40-60cm   | 15,2708857 | 46,2306173 | -50        | ACME, 2019, ICP total dig | < 0.063            | 3,11  | 465,7  | 1363,03 | 8905,2 | 3,089  | 60,6  | 14,7  | 1215  | 3,8   | 85,1  | 2,7   | 10,6  | 114   | 9,78  | 15,09 | 1,21  | 79    | 3,65  | 0,063  | 31,8  |
| VP01 60-80cm   | 15,2708857 | 46,2306173 | -70        | ACME, 2019, ICP total dig | < 0.063            | 8,29  | 1666,7 | 4516,87 | 26800  | 7,117  | 66,8  | 18,3  | 2417  | 6,1   | 275,4 | 2,8   | 10,6  | 121   | 31,28 | 46    | 3,99  | 89    | 2,38  | 0,054  | 30,9  |
| VP01 80-100cm  | 1          |            |            |                           |                    |       |        |         |        |        |       |       |       |       |       |       |       |       |       |       |       |       |       |        |       |

|                |            |            |      |                           |             |     |       |        |         |        |        |       |       |        |      |       |      |       |       |       |       |       |      |       |        |
|----------------|------------|------------|------|---------------------------|-------------|-----|-------|--------|---------|--------|--------|-------|-------|--------|------|-------|------|-------|-------|-------|-------|-------|------|-------|--------|
| S17 SS         | 15,2311504 | 46,1922087 | 0    | ACME, 2019, ICP total dig | 0.125-0.063 | 104 | 1,07  | 43,8   | 41,37   | 194,6  | 0,091  | 49,5  | 18,5  | 1131   | 3,26 | 11,6  | 2,2  | 11    | 139   | 1,4   | 2,39  | 0,5   | 77   | 4,72  | 0,086  |
| S18 SS         | 15,2333465 | 46,1642652 | 0    | ACME, 2019, ICP total dig | 0.125-0.063 | 76  | 1,01  | 37,6   | 34,24   | 169    | 0,202  | 40,3  | 17,2  | 848    | 3,14 | 10,6  | 2,3  | 10,1  | 134   | 1,48  | 2,22  | 0,5   | 75   | 4,98  | 0,081  |
| S19 SS         | 15,2391988 | 46,1464779 | 0    | ACME, 2019, ICP total dig | 0.125-0.063 | 80  | 1,28  | 37,55  | 35,36   | 172    | 0,127  | 42,9  | 16,05 | 1045,5 | 3,2  | 10,25 | 2,3  | 10,85 | 131,5 | 1,26  | 2,175 | 0,46  | 74,5 | 4,79  | 0,0815 |
| S20 SS         | 15,1964927 | 46,1333611 | 0    | ACME, 2019, ICP total dig | 0.125-0.063 | 86  | 0,8   | 26     | 19,39   | 104,6  | 0,067  | 23    | 9,8   | 609    | 2,3  | 8,9   | 1,7  | 6,5   | 180   | 0,44  | 1,06  | 0,15  | 52   | 8,97  | 0,051  |
| S21 SS         | 15,2109464 | 46,1213672 | 0    | ACME, 2019, ICP total dig | 0.125-0.063 | 88  | 1,15  | 41,6   | 36,02   | 165,5  | 0,121  | 52,9  | 17,2  | 916    | 3,44 | 13,3  | 2,3  | 10,3  | 162   | 1,23  | 2,19  | 0,51  | 80   | 5,3   | 0,09   |
| S22 SS         | 15,2190421 | 46,1088638 | 0    | ACME, 2019, ICP total dig | 0.125-0.063 | 70  | 1,09  | 27,7   | 32,46   | 134,9  | 0,1    | 40,3  | 13,9  | 850    | 2,74 | 10,3  | 2,1  | 8,9   | 179   | 0,7   | 1,53  | 0,3   | 68   | 7,23  | 0,066  |
| S23 SS         | 15,1896904 | 46,0893339 | 0    | ACME, 2019, ICP total dig | 0.125-0.063 | 90  | 0,84  | 23,5   | 29,27   | 85,1   | 0,088  | 32    | 11,4  | 676    | 2,35 | 9,5   | 1,9  | 8,1   | 159   | 0,52  | 1,04  | 0,22  | 56   | 6,79  | 0,052  |
| VO 01          | 15,2689241 | 46,2262241 | 0    | ACME, 2019, ICP total dig | 0.125-0.063 | 60  | 1,53  | 44,6   | 95,59   | 401,9  | 0,201  | 31,8  | 29    | 610    | 2,43 | 12,1  | 1,6  | 6,8   | 145   | 2,8   | 5,67  | 0,39  | 55   | 5,77  | 0,066  |
| VO 02          | 15,2961213 | 46,2298470 | 0    | ACME, 2019, ICP total dig | 0.125-0.063 | 34  | 2     | 29,4   | 24,44   | 103,2  | 0,05   | 25,6  | 8,8   | 1069   | 2,44 | 8     | 1,8  | 8,8   | 158   | 0,36  | 1,33  | 0,21  | 39   | 4,07  | 0,065  |
| VO 03          | 15,3098684 | 46,2235666 | 0    | ACME, 2019, ICP total dig | 0.125-0.063 | 82  | 1,4   | 29,6   | 30,74   | 149,2  | 0,054  | 27,1  | 8,8   | 667    | 2,34 | 6,9   | 1,8  | 7,3   | 145   | 0,52  | 1,11  | 0,18  | 47   | 3,13  | 0,053  |
| VO 04          | 15,3353340 | 46,2189141 | 0    | ACME, 2019, ICP total dig | 0.125-0.063 | 40  | 0,46  | 10     | 13,05   | 62,5   | 0,025  | 17,2  | 6,7   | 526    | 1,85 | 4,9   | 1,5  | 9,2   | 132   | 0,22  | 0,68  | 0,1   | 41   | 2,06  | 0,042  |
| VO 05          | 15,3688911 | 46,2123988 | 0    | ACME, 2019, ICP total dig | 0.125-0.063 | 56  | 0,58  | 14,9   | 16,31   | 68,3   | 0,028  | 26,7  | 9,1   | 571    | 2    | 6,2   | 1,2  | 5,5   | 144   | 0,29  | 0,78  | 0,13  | 47   | 2,48  | 0,052  |
| VO 06          | 15,4027925 | 46,2133318 | 0    | ACME, 2019, ICP total dig | 0.125-0.063 | 44  | 0,4   | 8,3    | 11,5    | 42,1   | 0,032  | 19,5  | 6,1   | 578    | 1,61 | 3,5   | 1,3  | 7,8   | 112   | 0,19  | 0,64  | 0,08  | 39   | 1,27  | 0,037  |
| VO 07          | 15,4177292 | 46,1990553 | 0    | ACME, 2019, ICP total dig | 0.125-0.063 | 54  | 0,41  | 8,2    | 12,98   | 39,4   | 0,03   | 22,3  | 7,6   | 627    | 1,55 | 5,5   | 1,2  | 5,2   | 137   | 0,12  | 0,63  | 0,08  | 38   | 1,51  | 0,034  |
| SP01 0-20cm    | 15,2157203 | 46,2329958 | -10  | ACME, 2019, ICP total dig | 0.125-0.063 | 36  | 0,68  | 20     | 31,06   | 141,5  | 0,076  | 34    | 10,6  | 629    | 2,55 | 8,3   | 2,2  | 8,1   | 128   | 1,08  | 1,09  | 0,23  | 64   | 6,7   | 0,042  |
| SP01 20-40cm   | 15,2157203 | 46,2329958 | -30  | ACME, 2019, ICP total dig | 0.125-0.063 | 42  | 0,66  | 22,4   | 34,01   | 153    | 0,117  | 33,8  | 11,3  | 664    | 2,67 | 7,6   | 1,9  | 7,7   | 146   | 1,45  | 0,99  | 0,21  | 74   | 7,9   | 0,036  |
| SP01 40-60cm   | 15,2157203 | 46,2329958 | -50  | ACME, 2019, ICP total dig | 0.125-0.063 | 50  | 0,62  | 21     | 24,76   | 103,1  | 0,096  | 34,1  | 11,5  | 659    | 2,61 | 8,6   | 1,8  | 7,3   | 141   | 0,87  | 0,86  | 0,19  | 71   | 9,11  | 0,037  |
| SP01 60-80cm   | 15,2157203 | 46,2329958 | -70  | ACME, 2019, ICP total dig | 0.125-0.063 | 18  | 0,64  | 19,6   | 23,34   | 90,2   | 0,089  | 36,1  | 10,7  | 606    | 2,53 | 8,4   | 1,7  | 6,3   | 147   | 0,65  | 0,94  | 0,2   | 70   | 9,13  | 0,035  |
| SP01 80-100cm  | 15,2157203 | 46,2329958 | -90  | ACME, 2019, ICP total dig | 0.125-0.063 | 2   | 0,62  | 15,1   | 18,28   | 68,9   | 0,069  | 25,9  | 10,6  | 556    | 2,3  | 7,7   | 1,8  | 7     | 140   | 0,28  | 0,84  | 0,19  | 62   | 9,97  | 0,03   |
| SP02 0-20cm    | 15,2399218 | 46,1970703 | -10  | ACME, 2019, ICP total dig | 0.125-0.063 | 74  | 0,68  | 18,2   | 21,66   | 100    | 0,071  | 28,2  | 10,6  | 628    | 2,41 | 6,9   | 2    | 8,8   | 146   | 0,45  | 0,91  | 0,22  | 57   | 7,77  | 0,041  |
| SP02 20-40cm   | 15,2399218 | 46,1970703 | -30  | ACME, 2019, ICP total dig | 0.125-0.063 | 102 | 0,7   | 21,6   | 25,4    | 89,8   | 0,082  | 34,1  | 11,7  | 659    | 2,61 | 8,6   | 2,1  | 8,7   | 132   | 0,4   | 1     | 0,21  | 64   | 7,59  | 0,044  |
| SP02 40-60cm   | 15,2399218 | 46,1970703 | -50  | ACME, 2019, ICP total dig | 0.125-0.063 | 100 | 0,7   | 17,8   | 20,7    | 78,6   | 0,074  | 31,8  | 10,6  | 612    | 2,5  | 9,3   | 2    | 9,1   | 136   | 0,24  | 0,99  | 0,18  | 61   | 8,75  | 0,036  |
| SP02 60-80cm   | 15,2399218 | 46,1970703 | -70  | ACME, 2019, ICP total dig | 0.125-0.063 | 84  | 0,965 | 23,85  | 34,205  | 131,9  | 0,0945 | 33,55 | 10,25 | 646,5  | 2,69 | 13,25 | 1,95 | 8,9   | 141   | 0,495 | 1,2   | 0,195 | 61,5 | 7,365 | 0,043  |
| SP02 80-100cm  | 15,2399218 | 46,1970703 | -90  | ACME, 2019, ICP total dig | 0.125-0.063 | 72  | 0,79  | 32,1   | 49,48   | 177,1  | 0,147  | 37    | 10,9  | 662    | 2,71 | 17    | 2    | 7,6   | 139   | 0,83  | 1,36  | 0,25  | 63   | 6,64  | 0,039  |
| SP02 100-120cm | 15,2399218 | 46,1970703 | -110 | ACME, 2019, ICP total dig | 0.125-0.063 | 64  | 0,75  | 23,2   | 41,47   | 139,9  | 0,078  | 36,5  | 10,8  | 592    | 2,52 | 10,8  | 2    | 8,9   | 130   | 0,64  | 1,14  | 0,21  | 62   | 6,8   | 0,032  |
| SP02 120-140cm | 15,2399218 | 46,1970703 | -130 | ACME, 2019, ICP total dig | 0.125-0.063 | 98  | 0,69  | 23,3   | 51,94   | 149    | 0,119  | 34,8  | 11,3  | 598    | 2,62 | 10,3  | 2    | 8     | 136   | 0,82  | 2,32  | 0,24  | 62   | 6,79  | 0,038  |
| VP01 0-20cm    | 15,2708857 | 46,2306173 | -10  | ACME, 2019, ICP total dig | 0.125-0.063 | 78  | 1,1   | 85,7   | 199,6   | 1201,4 | 0,687  | 32,1  | 14,6  | 601    | 2,68 | 20,2  | 1,8  | 8,2   | 132   | 3,49  | 2,67  | 0,37  | 56   | 4,84  | 0,067  |
| VP01 20-40cm   | 15,2708857 | 46,2306173 | -30  | ACME, 2019, ICP total dig | 0.125-0.063 | 62  | 0,9   | 56,6   | 119,25  | 931,5  | 0,342  | 38,1  | 11,3  | 716    | 2,61 | 15,3  | 2    | 8,4   | 104   | 3,24  | 1,98  | 0,29  | 69   | 5,93  | 0,047  |
| VP01 40-60cm   | 15,2708857 | 46,2306173 | -50  | ACME, 2019, ICP total dig | 0.125-0.063 | 92  | 2,09  | 359,1  | 965,53  | 6671,3 | 2,036  | 46,8  | 12,5  | 965    | 3,23 | 70,2  | 2,1  | 8,4   | 106   | 7,28  | 10,81 | 1,09  | 65   | 4,44  | 0,051  |
| VP01 60-80cm   | 15,2708857 | 46,2306173 | -70  | ACME, 2019, ICP total dig | 0.125-0.063 | 58  | 6,74  | 1409,7 | 3406,34 | 22300  | 6,87   | 53,6  | 16,6  | 2077   | 5,5  | 243   | 2,5  | 9,4   | 113   | 22,35 | 36,7  | 3,32  | 75   | 2,6   | 0,05   |
| VP01 80-100cm  | 15,2708857 | 46,2306173 | -90  | ACME, 2019, ICP total dig | 0.125-0.063 | 94  | 7,4   | 1409,4 | 3389,42 | 20100  | 5,9    | 55,9  | 15    | 1707   | 5,33 | 253,1 | 2,4  | 9,3   | 114   | 22,83 | 39,18 | 4,16  | 68   | 2,52  | 0,047  |
| VP01 100-120cm | 15,2708857 | 46,2306173 | -110 | ACME, 2019, ICP total dig | 0.125-0.063 | 96  | 6,66  | 1261,1 | 2936,11 | 20400  | 5,333  | 53,4  | 15,9  | 1632   | 4,78 | 222,8 | 2,3  | 9,2   | 122   | 23,07 | 34,6  | 3,58  | 70   | 2,11  | 0,056  |
| VP01 120-140cm | 15,2708857 | 46,2306173 | -130 | ACME, 2019, ICP total dig | 0.125-0.063 | 66  | 7,02  | 1415,1 | 3329,55 | 20500  | 6,117  | 65    | 16,1  | 1860   | 5,45 | 232,5 | 2,2  | 8,5   | 118   | 17,88 | 36,42 | 3,31  | 74   | 2,34  | 0,045  |
| VP02 0-20cm    | 15,3522975 | 46,2168017 | -10  | ACME, 2019, ICP total dig | 0.125-0.063 | 38  | 0,83  | 14     | 18,13   | 64,7   | 0,042  | 31,5  | 9,5   | 456    | 2,22 | 8     | 1,5  | 6,7   | 142   | 0,39  | 0,89  | 0,17  | 57   | 1,58  | 0,037  |
| VP02 20-40cm   | 15,3522975 | 46,2168017 | -30  | ACME, 2019, ICP total dig | 0.125-0.063 | 46  | 0,78  | 13,6   | 19,34   | 75,2   | 0,032  | 36,9  | 9,5   | 438    | 2,18 | 7,3   | 1,4  | 6,5   | 129   | 0,42  | 0,87  | 0,17  | 56   | 1,25  | 0,041  |
| VP02 40-60cm   | 15,3522975 | 46,2168017 | -50  | ACME, 2019, ICP total dig | 0.125-0.063 | 32  | 0,73  | 15,2   | 21,18   | 81,1   | 0,033  | 43,5  | 10,7  | 505    | 2,28 | 7,3   | 1,4  | 6,6   | 137   | 0,52  | 0,94  | 0,17  | 58   | 1,33  | 0,039  |
| VP02 60-80cm   | 15,3522975 | 46,2168017 | -70  | ACME, 2019, ICP total dig | 0.125-0.063 | 106 | 0,695 | 13,2   | 21,455  | 76,9   | 0,0625 | 39,7  | 9,6   | 480,5  | 2,16 | 6,4   | 1,65 | 7,9   | 130   | 0,485 | 0,975 | 0,2   | 54,5 | 1,395 | 0,0415 |

Table S1. Continue

|                | LON        | LAT        | DEPTH (cm) | ANALYTICS                 | PARTICLE SIZE (mm) | Cr    | Mg    | Ba    | Ti     | Al    | Na     | K     | W     | Zr    | Sn    | Be    | Sc    | S     | Y     | Ce     | Pr    | Nd    | Sm    | Eu    | Gd    |
|----------------|------------|------------|------------|---------------------------|--------------------|-------|-------|-------|--------|-------|--------|-------|-------|-------|-------|-------|-------|-------|-------|--------|-------|-------|-------|-------|-------|
|                |            |            |            |                           |                    | mg/kg | %     | mg/kg | %      | %     | %      | %     | mg/kg | mg/kg | mg/kg | mg/kg | mg/kg | %     | mg/kg | mg/kg  | mg/kg | mg/kg | mg/kg | mg/kg | mg/kg |
| S01 SS         | 14,6476474 | 46,4194598 | 0          | ACME, 2019, ICP total dig | < 0.063            | 59    | 3,39  | 429   | 0,282  | 6,78  | 0,596  | 1,94  | 1,1   | 23,1  | 2,7   | 2     | 10,1  | 0,17  | 5,4   | 53,62  | 6,2   | 23,4  | 4,4   | 1,1   | 3,3   |
| S02 SS         | 14,7274470 | 46,3795956 | 0          | ACME, 2019, ICP total dig | < 0.063            | 42    | 4,35  | 254   | 0,201  | 4,5   | 0,462  | 1,2   | 1     | 16,1  | 2     | 0,5   | 7,2   | 0,06  | 5,9   | 37,07  | 4     | 15,6  | 3     | 0,6   | 2,3   |
| S03 SS         | 14,7387350 | 46,3595111 | 0          | ACME, 2019, ICP total dig | < 0.063            | 43    | 3,94  | 288   | 0,22   | 5,39  | 0,531  | 1,47  | 0,9   | 17,2  | 2,4   | 1     | 8,2   | 0,05  | 6,6   | 44,05  | 5,3   | 17,2  | 3,9   | 0,7   | 2,4   |
| S04 SS         | 14,7488684 | 46,3552343 | 0          | ACME, 2019, ICP total dig | < 0.063            | 40    | 4,86  | 230   | 0,176  | 4,11  | 0,41   | 1     | 0,9   | 17    | 1,4   | 0,5   | 6,4   | 0,08  | 5,8   | 30,74  | 3,5   | 13,3  | 2,8   | 0,5   | 2     |
| S05 SS         | 14,8053260 | 46,3621756 | 0          | ACME, 2019, ICP total dig | < 0.063            | 40    | 4,13  | 229   | 0,201  | 4,55  | 0,497  | 1,16  | 0,9   | 26    | 2     | 2     | 6,9   | 0,05  | 7,2   | 35,8   | 4,4   | 16,3  | 3,1   | 0,6   | 2,5   |
| S06 SS         | 14,8343532 | 46,3397145 | 0          | ACME, 2019, ICP total dig | < 0.063            | 39    | 4,56  | 212   | 0,188  | 4,34  | 0,508  | 1,2   | 0,7   | 26,6  | 3,5   | 0,5   | 6,9   | 0,04  | 7     | 31,38  | 4,1   | 14    | 3     | 0,6   | 1,9   |
| S07 SS         | 14,8870108 | 46,3104630 | 0          | ACME, 2019, ICP total dig | < 0.063            | 40    | 4,38  | 220   | 0,229  | 4,68  | 0,589  | 1,3   | 0,9   | 30,8  | 2,1   | 0,5   | 7,8   | 0,05  | 8,4   | 36,64  | 4,5   | 16,4  | 3,1   | 0,7   | 2,4   |
| S08 SS         | 14,9254488 | 46,3128814 | 0          | ACME, 2019, ICP total dig | < 0.063            | 47    | 4,11  | 205   | 0,244  | 4,79  | 0,635  | 1,19  | 0,9   | 33,4  | 2,1   | 0,5   | 7,6   | 0,11  | 8     | 36,8   | 4,3   | 16,5  | 3,7   | 0,7   | 2,8   |
| S09 SS         | 14,9651475 | 46,3369110 | 0          | ACME, 2019, ICP total dig | < 0.063            | 45    | 2,05  | 272   | 0,311  | 6,06  | 0,942  | 1,77  | 2     | 76,5  | 3,5   | 1     | 8,6   | 0,07  | 18,7  | 65,5   | 7,5   | 27,9  | 5,6   | 1     | 4,6   |
| S10 SS         | 15,0172568 | 46,3172106 | 0          | ACME, 2019, ICP total dig | < 0.063            | 40    | 3,33  | 218   | 0,286  | 5,11  | 0,769  | 1,4   | 1,2   | 52    | 2,7   | 0,5   | 7,7   | 0,11  | 12,5  | 48     | 5,6   | 22    | 4,1   | 0,7   | 3,5   |
| S11 SS         | 15,0800962 | 46,2648267 | 0          | ACME, 2019, ICP total dig | < 0.063            | 60    | 2,79  | 238   | 0,368  | 5,51  | 0,833  | 1,27  | 1,4   | 47,5  | 3,1   | 1     | 9     | 0,17  | 15,4  | 56,05  | 6,4   | 22,6  | 4,7   | 1     | 4,2   |
| S12 SS         | 15,1413873 | 46,2385786 | 0          | ACME, 2019, ICP total dig | < 0.063            | 74    | 1,57  | 455   | 0,272  | 6,96  | 0,658  | 2,25  | 1,5   | 36,6  | 3,5   | 3     | 11,1  | 0,06  | 12,9  | 48,89  | 5,9   | 24,8  | 5,3   | 1     | 4,4   |
| S13 SS         | 15,2262118 | 46,2333114 | 0          | ACME, 2019, ICP total dig | < 0.063            | 84    | 1,54  | 455   | 0,312  | 7,42  | 0,679  | 2,34  | 1,6   | 40,7  | 3,8   | 2     | 12,3  | 0,07  | 15,3  | 49,87  | 6,1   | 24,5  | 5,7   | 1,1   | 4,3   |
| S14 SS         | 15,2665229 | 46,2243699 | 0          | ACME, 2019, ICP total dig | < 0.063            | 78    | 1,56  | 467   | 0,275  | 6,77  | 0,687  | 2,17  | 1,6   | 42,4  | 4,1   | 3     | 10,8  | 0,07  | 12,8  | 48,62  | 5,5   | 24,7  | 4,6   | 0,9   | 4,2   |
| S15 SS         | 15,2644737 | 46,2188428 | 0          | ACME, 2019, ICP total dig | < 0.063            | 79    | 1,54  | 693   | 0,354  | 5,78  | 0,897  | 1,57  | 2     | 45,5  | 4,6   | 1     | 8,8   | 0,1   | 14,9  | 62,98  | 7,3   | 27,4  | 5,5   | 1     | 4,3   |
| S16 SS         | 15,2380028 | 46,2017385 | 0          | ACME, 2019, ICP total dig | < 0.063            | 89    | 1,23  | 428   | 0,309  | 6     | 0,699  | 1,83  | 1,6   | 42,5  | 3,9   | 2     | 8,8   | 0,09  | 12,7  | 39,68  | 4,9   | 19,4  | 3,7   | 1     | 3,3   |
| S17 SS         | 15,2311504 | 46,1922087 | 0          | ACME, 2019, ICP total dig | < 0.063            | 70    | 1,52  | 442   | 0,277  | 6,55  | 0,743  | 1,93  | 1,4   | 40,3  | 3,8   | 2     | 10,5  | 0,07  | 14,3  | 50,23  | 6,3   | 23,6  | 4,9   | 0,9   | 4,2   |
| S18 SS         | 15,2333465 | 46,1642652 | 0          | ACME, 2019, ICP total dig | < 0.063            | 71    | 1,73  | 412,5 | 0,3085 | 6,785 | 0,7625 | 1,9   | 1,65  | 46,6  | 3,65  | 2,5   | 11,3  | 0,115 | 16,5  | 61,145 | 7,45  | 27    | 5,55  | 1,05  | 4,2   |
| S19 SS         | 15,2391988 | 46,1464779 | 0          | ACME, 2019, ICP total dig | < 0.063            | 77    | 1,53  | 428   | 0,299  | 6,575 | 0,7345 | 2,025 | 1,65  | 45,9  | 3,55  | 2     | 11,35 | 0,095 | 15,3  | 53,51  | 6,4   | 23,9  | 5,05  | 0,95  | 4,05  |
| S20 SS         | 15,1964927 | 46,1333611 | 0          | ACME, 2019, ICP total dig | < 0.063            | 53    | 2,36  | 397   | 0,255  | 5,2   | 0,786  | 1,41  | 1,1   | 34,9  | 2,9   | 1     | 8,4   | 0,11  | 13,6  | 50,17  | 6     | 22    | 4,2   | 0,8   | 4     |
| S21 SS         | 15,2109464 | 46,1213672 | 0          | ACME, 2019, ICP total dig | < 0.063            | 85    | 1,58  | 436   | 0,298  | 6,85  | 0,595  | 2,13  | 1,6   | 43,1  | 4,2   | 3     | 12,5  | 0,1   | 17,6  | 58,96  | 7,1   | 27,1  | 5,4   | 1,1   | 4,4   |
| S22 SS         | 15,2190421 | 46,1088638 | 0          | ACME, 2019, ICP total dig | < 0.063            | 77    | 1,81  | 424   | 0,296  | 6,745 | 0,673  | 1,785 | 1,45  | 46    | 3,45  | 2     | 11    | 0,09  | 15,2  | 61,83  | 7,4   | 27,9  | 5,5   | 1,1   | 4,45  |
| S23 SS         | 15,1896904 | 46,0893339 | 0          | ACME, 2019, ICP total dig | < 0.063            | 65    | 1,97  | 375,5 | 0,276  | 5,925 | 0,6845 | 1,68  | 1,45  | 40,3  | 2,85  | 2     | 9,8   | 0,085 | 15,4  | 58,83  | 6,75  | 25,05 | 5     | 0,95  | 3,95  |
| VO 01          | 15,2689241 | 46,2262241 | 0          | ACME, 2019, ICP total dig | < 0.063            | 90    | 1,71  | 988   | 0,399  | 5,4   | 0,864  | 1,38  | 2,6   | 47,4  | 5,1   | 3     | 8,6   | 0,11  | 14,4  | 65,45  | 8,9   | 29,2  | 5,9   | 1,1   | 4,2   |
| VO 02          | 15,2961213 | 46,2298470 | 0          | ACME, 2019, ICP total dig | < 0.063            | 75,5  | 0,845 | 365   | 0,287  | 4,84  | 0,7025 | 1,37  | 1,7   | 51,2  | 6,4   | 1,5   | 6,95  | 0,095 | 15,8  | 58,88  | 7,15  | 24,85 | 4,75  | 1     | 4,55  |
| VO 03          | 15,3098684 | 46,2235666 | 0          | ACME, 2019, ICP total dig | < 0.063            | 90,3  | 0,997 | 345,7 | 0,347  | 5,66  | 0,9197 | 1,63  | 1,63  | 58,0  | 4,5   | 1,7   | 8,77  | 0,07  | 15,2  | 63,64  | 7,53  | 28,2  | 5,4   | 0,933 | 3,97  |
| VO 04          | 15,3353340 | 46,2189141 | 0          | ACME, 2019, ICP total dig | < 0.063            | 71    | 0,68  | 311   | 0,49   | 4,8   | 1,046  | 1,43  | 1,2   | 46,1  | 2,6   | 1     | 6,2   | 0,04  | 16,4  | 107,06 | 12,5  | 47,7  | 9,8   | 1,4   | 7,4   |
| VO 05          | 15,3688911 | 46,2123988 | 0          | ACME, 2019, ICP total dig | < 0.063            | 67    | 0,8   | 327   | 0,375  | 5,04  | 0,997  | 1,44  | 1,3   | 39,7  | 3,2   | 2     | 7,6   | 0,06  | 13,1  | 57,75  | 7     | 26,8  | 5,4   | 0,9   | 4,3   |
| VO 06          | 15,4027925 | 46,2133318 | 0          | ACME, 2019, ICP total dig | < 0.063            | 90    | 0,56  | 329   | 0,524  | 5,11  | 1,185  | 1,41  | 1,4   | 45,3  | 2,1   | 1     | 6,7   | 0,02  | 13,8  | 104,15 | 11,7  | 43,1  | 8,3   | 1,3   | 6     |
| VO 07          | 15,4177292 | 46,1990553 | 0          | ACME, 2019, ICP total dig | < 0.063            | 69,5  | 0,545 | 308   | 0,491  | 4,91  | 1,4255 | 1,485 | 1,2   | 48,3  | 3,5   | 1,5   | 6     | 0,02  | 14,5  | 97,335 | 10,95 | 40,5  | 7,7   | 1,1   | 5,4   |
| SP01 0-20cm    | 15,2157203 | 46,2329958 | -10        | ACME, 2019, ICP total dig | < 0.063            | 71    | 2,63  | 286   | 0,328  | 5,94  | 0,724  | 1,48  | 1,1   | 58,6  | 3,2   | 2     | 9,6   | 0,06  | 16,9  | 52,63  | 6,2   | 21,7  | 4,4   | 1,1   | 4     |
| SP01 20-40cm   | 15,2157203 | 46,2329958 | -30        | ACME, 2019, ICP total dig | < 0.063            | 71    | 2,58  | 294   | 0,309  | 6,06  | 0,789  | 1,35  | 1,1   | 61,9  | 2,7   | 2     | 9,6   | 0,04  | 15,5  | 50,79  | 6,1   | 23    | 4,4   | 0,9   | 3,8   |
| SP01 40-60cm   | 15,2157203 | 46,2329958 | -50        | ACME, 2019, ICP total dig | < 0.063            | 58    | 3     | 265   | 0,29   | 5,81  | 0,821  | 1,29  | 1     | 51,8  | 2,5   | 2     | 9,6   | 0,02  | 14,4  | 46,85  | 5,7   | 20,9  | 4,3   | 1     | 3,7   |
| SP01 60-80cm   | 15,2157203 | 46,2329958 | -70        | ACME, 2019, ICP total dig | < 0.063            | 61    | 3,21  | 271   | 0,299  | 5,79  | 0,782  | 1,33  | 1,2   | 54,5  | 3,2   | 2     | 9,2   | 0,02  | 15    | 50,33  | 6     | 22,4  | 4,6   | 0,9   | 3,7   |
| SP01 80-100cm  | 15,2157203 | 46,2329958 | -90        | ACME, 2019, ICP total dig | < 0.063            | 59    | 3,15  | 264   | 0,303  | 5,55  | 0,746  | 1,37  | 1,2   | 54,9  | 4,9   | 0,5   | 9,3   | 0,02  | 14,3  | 48,45  | 5,7   | 21,5  | 4,4   | 0,9   | 3,4   |
| SP02 0-20cm    | 15,2399218 | 46,1970703 | -10        | ACME, 2019, ICP total dig | < 0.063            | 55    | 2,7   | 389   | 0,274  | 5,12  | 0,771  | 1,34  | 1,2   | 45,3  | 2,6   | 2     | 8,8   | 0,08  | 14,6  | 49,15  | 6,4   | 21,8  | 4,2   | 0,9   | 3,3   |
| SP02 20-40cm   | 15,2399218 | 46,1970703 | -30        | ACME, 2019, ICP total dig | < 0.063            | 59    | 2,62  | 446   | 0,28   | 5,78  | 0,694  | 1,51  | 1,3   | 49,5  | 2,8   | 2     | 9,6   | 0,06  | 15,1  | 54,11  | 6,6   | 22,8  | 4,6   | 1     | 4,2   |
| SP02 40-60cm   | 15,2399218 | 46,1970703 | -50        | ACME, 2019, ICP total dig | < 0.063            | 56    | 2,79  | 464   | 0,284  | 5,47  | 0,769  | 1,42  | 1,2   | 50,9  | 2,5   | 2     | 9,7   | 0,05  | 15,3  | 51,36  | 6,3   | 22    | 4,6   | 0,9   | 3,8   |
| SP02 60-80cm   | 15,2399218 | 46,1970703 | -70        | ACME, 2019, ICP total dig | < 0.063            | 82    | 2,49  | 1131  | 0,311  | 6     | 0,794  | 1,58  | 1,3   | 55    | 4     | 2     | 10,3  | 0,07  | 17,9  | 53,85  | 6,8   | 23,1  | 4,9   | 0,9   | 4     |
| SP02 80-100cm  | 15,2399218 | 46,1970703 | -90        | ACME, 2019, ICP total dig | < 0.063            | 124   | 2,35  | 1251  | 0,325  | 6,03  | 0,733  | 1,44  | 1,3   | 58,3  | 3     | 2     | 10,2  | 0,08  | 16,7  | 59,64  | 6,4   | 27,4  | 5,5   | 1,2   | 4,5   |
| SP02 100-120cm | 15,2399218 | 46,1970703 | -110       | ACME, 2019, ICP total dig | < 0.063            | 84    | 2,33  | 632   | 0,323  | 5,91  | 0,763  | 1,43  | 1,3   | 59    | 3,4   | 1     | 9,7   | 0,07  | 16,1  | 54,08  | 5,9   | 23,9  | 4,5   | 1,1   | 4,2   |
| SP02 120-140cm | 15,2399218 | 46,1970703 | -130       | ACME, 2019, ICP total dig | < 0.063            | 66    | 2,35  | 465   | 0,308  | 6,15  | 0,779  | 1,5   | 1,4   | 55,1  | 3,9   | 2     | 10,4  | 0,05  | 17,7  | 59,8   | 7     | 26,1  | 5,1   | 1     | 4,6   |
| VP01 0-20cm    | 15,2708857 | 46,2306173 | -10        | ACME, 2019, ICP total dig | < 0.063            | 71    | 1,89  | 1074  | 0,341  | 5,58  | 0,831  | 1,44  | 2     | 45,2  | 5,1   | 2     | 9     | 0,07  | 16,3  | 63,41  | 8,1   | 27,8  | 5,1   | 1     | 4,1   |
| VP01 20-40cm   | 15,2708857 | 46,2306173 | -30        | ACME, 2019, ICP total dig | < 0.063            | 70    | 2,62  | 690   | 0,342  | 6,15  | 0,736  | 1,44  | 1,5   | 56,4  | 6,9   | 2     | 10,2  | 0,02  | 17,6  | 60,5   | 6,7   | 27,6  | 5,2   | 1,1   | 4,2   |
| VP01 40-60cm   | 15,2708857 | 46,2306173 | -50        | ACME, 2019, ICP total dig | < 0.063            | 69    | 2,12  | 730   | 0,319  | 6,14  | 0,733  | 1,55  | 2,1   | 50,5  | 9,3   | 2     | 10,4  | 0,05  | 18    | 60,16  | 7,4   | 26,1  | 5,4   | 1,1   | 4,3   |
| VP01 60-80cm   | 15,2708857 | 46,2306173 | -70        | ACME, 2019, ICP total dig | < 0.063            | 96    | 1,29  | 711   | 0,35   | 6,45  | 0,713  | 1,62  | 3,2   | 44,4  | 25,7  | 2     | 11,1  | 0,05  | 17,4  | 65,54  | 7,2   | 28,6  | 6,1   | 1,2   | 4,6   |
| VP01 80-100cm  | 15,2708857 | 46,2306173 | -90        | ACME, 2019, ICP total dig | < 0.063            | 74    | 1,32  | 665   | 0,322  | 6,48  | 0,73   | 1,68  | 2,6   | 43,5  | 25,6  | 3     | 10,6  | 0,04  | 18,7  | 68,37  | 8,2   | 29,5  | 5,8   | 1,1   | 5,3   |
| VP01 100-120cm | 15,2708857 | 46,2306173 | -110       | ACME, 2019, ICP total dig | < 0.063            | 74    | 1,2   |       |        |       |        |       |       |       |       |       |       |       |       |        |       |       |       |       |       |

|                |            |            |      |                           |             |      |      |       |       |        |       |       |       |      |       |      |     |      |       |       |        |      |      |      |     |
|----------------|------------|------------|------|---------------------------|-------------|------|------|-------|-------|--------|-------|-------|-------|------|-------|------|-----|------|-------|-------|--------|------|------|------|-----|
| S20 SS         | 15,1964927 | 46,1333611 | 0    | ACME, 2019, ICP total dig | 0.125-0.063 | 21   | 33   | 2,92  | 408   | 0,235  | 4,3   | 0,742 | 1,27  | 0,9  | 33,6  | 2,2  | 1   | 7,6  | 0,1   | 13,3  | 42,1   | 5    | 17   | 3,6  | 0,7 |
| S21 SS         | 15,2109464 | 46,1213672 | 0    | ACME, 2019, ICP total dig | 0.125-0.063 | 30,8 | 80   | 1,68  | 444   | 0,274  | 6,69  | 0,54  | 1,87  | 1,6  | 41,2  | 3,5  | 2   | 11,9 | 0,12  | 18,6  | 58,87  | 7,2  | 25,7 | 5,5  | 1   |
| S22 SS         | 15,2190421 | 46,1088638 | 0    | ACME, 2019, ICP total dig | 0.125-0.063 | 24,5 | 64   | 2,23  | 394   | 0,252  | 5,69  | 0,564 | 1,58  | 1,3  | 38,9  | 2,7  | 2   | 10,2 | 0,09  | 14,7  | 49,91  | 5,8  | 23,2 | 4,5  | 0,8 |
| S23 SS         | 15,1896904 | 46,0893339 | 0    | ACME, 2019, ICP total dig | 0.125-0.063 | 25   | 51   | 2,25  | 464   | 0,225  | 4,47  | 0,581 | 1,31  | 1    | 30,4  | 2,1  | 1   | 7,4  | 0,07  | 12,1  | 46,47  | 5,7  | 20,1 | 4,1  | 0,7 |
| VO 01          | 15,2689241 | 46,2262241 | 0    | ACME, 2019, ICP total dig | 0.125-0.063 | 21,1 | 59   | 1,9   | 1100  | 0,329  | 4,45  | 0,725 | 1,16  | 2,2  | 36,3  | 2,6  | 2   | 6,9  | 0,09  | 11,7  | 42,04  | 4,7  | 19,1 | 3,4  | 0,9 |
| VO 02          | 15,2961213 | 46,2298470 | 0    | ACME, 2019, ICP total dig | 0.125-0.063 | 25,6 | 61   | 0,71  | 328   | 0,364  | 4,4   | 0,882 | 1,53  | 1,5  | 35,3  | 4,7  | 1   | 6,3  | 0,08  | 13,9  | 44,56  | 5,2  | 18,2 | 4    | 0,7 |
| VO 03          | 15,3098684 | 46,2235666 | 0    | ACME, 2019, ICP total dig | 0.125-0.063 | 20,8 | 55   | 0,8   | 323   | 0,296  | 4,58  | 0,884 | 1,58  | 1,3  | 32,9  | 3    | 2   | 6,8  | 0,06  | 13,5  | 41,52  | 5,1  | 18,4 | 4    | 0,7 |
| VO 04          | 15,3353340 | 46,2189141 | 0    | ACME, 2019, ICP total dig | 0.125-0.063 | 27,8 | 103  | 0,47  | 272   | 0,482  | 3,99  | 0,951 | 1,3   | 1,2  | 29    | 1,7  | 0,5 | 5,2  | 0,02  | 12,4  | 57,29  | 6,6  | 25   | 4,4  | 0,8 |
| VO 05          | 15,3688911 | 46,2123988 | 0    | ACME, 2019, ICP total dig | 0.125-0.063 | 18,1 | 45   | 0,59  | 310   | 0,318  | 4,41  | 0,916 | 1,49  | 1    | 28,5  | 1,9  | 0,5 | 5,8  | 0,02  | 9,9   | 37,57  | 4,4  | 16   | 3,2  | 0,6 |
| VO 06          | 15,4027925 | 46,2133318 | 0    | ACME, 2019, ICP total dig | 0.125-0.063 | 21,2 | 108  | 0,39  | 294   | 0,458  | 3,97  | 1,028 | 1,31  | 1    | 23,3  | 1,4  | 1   | 4,5  | 0,02  | 10,1  | 43,38  | 4,7  | 18,3 | 3,5  | 0,6 |
| VO 07          | 15,4177292 | 46,1990553 | 0    | ACME, 2019, ICP total dig | 0.125-0.063 | 17,9 | 41   | 0,41  | 329   | 0,361  | 4,33  | 1,178 | 1,53  | 0,9  | 25,2  | 1,5  | 1   | 4,6  | 0,02  | 8,2   | 36,71  | 4    | 16   | 3    | 0,7 |
| SP01 0-20cm    | 15,2157203 | 46,2329958 | -10  | ACME, 2019, ICP total dig | 0.125-0.063 | 25,8 | 51   | 3,18  | 267   | 0,286  | 5,22  | 0,765 | 1,29  | 2,2  | 52,5  | 2,4  | 0,5 | 8,6  | 0,05  | 15,7  | 46,03  | 5,9  | 19,8 | 3,9  | 0,9 |
| SP01 20-40cm   | 15,2157203 | 46,2329958 | -30  | ACME, 2019, ICP total dig | 0.125-0.063 | 24   | 50   | 2,87  | 282   | 0,278  | 5,49  | 0,814 | 1,26  | 1    | 51,2  | 3,4  | 1   | 9    | 0,02  | 15,1  | 45,96  | 5,5  | 20,2 | 3,8  | 0,9 |
| SP01 40-60cm   | 15,2157203 | 46,2329958 | -50  | ACME, 2019, ICP total dig | 0.125-0.063 | 23,4 | 45   | 3,31  | 261   | 0,281  | 5,37  | 0,733 | 1,17  | 0,9  | 49,3  | 2,1  | 2   | 8,7  | 0,02  | 14,2  | 46,64  | 5,2  | 19,5 | 3,7  | 0,8 |
| SP01 60-80cm   | 15,2157203 | 46,2329958 | -70  | ACME, 2019, ICP total dig | 0.125-0.063 | 20   | 52   | 3,42  | 236   | 0,266  | 5,08  | 0,755 | 1,21  | 0,9  | 56    | 6,4  | 0,5 | 8,6  | 0,02  | 14    | 38,9   | 4,8  | 16,9 | 3,8  | 0,8 |
| SP01 80-100cm  | 15,2157203 | 46,2329958 | -90  | ACME, 2019, ICP total dig | 0.125-0.063 | 22,1 | 33   | 3,82  | 225   | 0,277  | 4,54  | 0,746 | 1,11  | 1    | 52    | 2,2  | 2   | 7,6  | 0,02  | 13,2  | 44,69  | 5    | 19,8 | 4,1  | 0,7 |
| SP02 0-20cm    | 15,2399218 | 46,1970703 | -10  | ACME, 2019, ICP total dig | 0.125-0.063 | 25,5 | 43   | 3,09  | 377   | 0,253  | 4,64  | 0,789 | 1,25  | 1    | 43,5  | 2,4  | 2   | 8    | 0,07  | 14,3  | 48,71  | 5,8  | 20,2 | 4,2  | 0,8 |
| SP02 20-40cm   | 15,2399218 | 46,1970703 | -30  | ACME, 2019, ICP total dig | 0.125-0.063 | 24,9 | 50   | 3,03  | 398   | 0,253  | 5,03  | 0,78  | 1,33  | 1,1  | 43,6  | 2,4  | 1   | 8,4  | 0,05  | 14,4  | 47,09  | 5,4  | 20,2 | 3,8  | 0,8 |
| SP02 40-60cm   | 15,2399218 | 46,1970703 | -50  | ACME, 2019, ICP total dig | 0.125-0.063 | 27   | 38   | 3,5   | 415   | 0,283  | 4,73  | 0,884 | 1,28  | 1    | 50    | 4,6  | 1   | 8,7  | 0,02  | 15,2  | 50,65  | 6,1  | 22,3 | 4,2  | 0,8 |
| SP02 60-80cm   | 15,2399218 | 46,1970703 | -70  | ACME, 2019, ICP total dig | 0.125-0.063 | 26   | 48   | 2,99  | 1082  | 0,3005 | 4,92  | 0,857 | 1,325 | 1,15 | 49,7  | 3,7  | 1,5 | 8,5  | 0,045 | 15,35 | 50,88  | 5,9  | 21,6 | 4,3  | 0,7 |
| SP02 80-100cm  | 15,2399218 | 46,1970703 | -90  | ACME, 2019, ICP total dig | 0.125-0.063 | 23,8 | 78   | 2,6   | 1167  | 0,296  | 5,35  | 0,775 | 1,32  | 1,2  | 53,9  | 2,9  | 2   | 8,7  | 0,05  | 14,6  | 47,92  | 5,3  | 20,6 | 4,6  | 1   |
| SP02 100-120cm | 15,2399218 | 46,1970703 | -110 | ACME, 2019, ICP total dig | 0.125-0.063 | 24,3 | 60   | 2,67  | 498   | 0,299  | 5,31  | 0,794 | 1,26  | 1,1  | 48,9  | 2,5  | 1   | 8,3  | 0,05  | 14,1  | 47,62  | 5,1  | 19,5 | 4,1  | 0,7 |
| SP02 120-140cm | 15,2399218 | 46,1970703 | -130 | ACME, 2019, ICP total dig | 0.125-0.063 | 24   | 47   | 2,7   | 494   | 0,284  | 5,18  | 0,805 | 1,32  | 1    | 48,5  | 3,2  | 1   | 9,2  | 0,02  | 15,9  | 45,47  | 5,5  | 19,5 | 4,2  | 0,9 |
| VP01 0-20cm    | 15,2708857 | 46,2306173 | -10  | ACME, 2019, ICP total dig | 0.125-0.063 | 27,1 | 68   | 2,02  | 1069  | 0,305  | 4,64  | 0,778 | 1,27  | 1,4  | 30,5  | 3,6  | 1   | 7,4  | 0,06  | 14,4  | 51,19  | 6,2  | 22,1 | 4,3  | 0,8 |
| VP01 20-40cm   | 15,2708857 | 46,2306173 | -30  | ACME, 2019, ICP total dig | 0.125-0.063 | 33,4 | 60   | 3,22  | 533   | 0,315  | 5,37  | 0,718 | 1,24  | 1,3  | 46,3  | 3    | 0,5 | 9,3  | 0,02  | 14,5  | 49,77  | 5,6  | 20,8 | 4,7  | 0,9 |
| VP01 40-60cm   | 15,2708857 | 46,2306173 | -50  | ACME, 2019, ICP total dig | 0.125-0.063 | 25   | 55   | 2,46  | 585   | 0,279  | 5,25  | 0,709 | 1,34  | 1,6  | 40,5  | 6,8  | 1   | 9    | 0,02  | 15,1  | 47,29  | 5,7  | 20,6 | 4,2  | 0,9 |
| VP01 60-80cm   | 15,2708857 | 46,2306173 | -70  | ACME, 2019, ICP total dig | 0.125-0.063 | 29,2 | 77   | 1,39  | 644   | 0,316  | 5,73  | 0,712 | 1,43  | 2,6  | 36,3  | 20,9 | 1   | 9,8  | 0,04  | 15,2  | 61,45  | 6,8  | 25,4 | 5,3  | 1,1 |
| VP01 80-100cm  | 15,2708857 | 46,2306173 | -90  | ACME, 2019, ICP total dig | 0.125-0.063 | 29,5 | 61   | 1,45  | 587   | 0,293  | 5,59  | 0,746 | 1,5   | 2,1  | 37,3  | 21,8 | 2   | 9,2  | 0,02  | 15,8  | 57,2   | 6,8  | 24   | 4,6  | 0,9 |
| VP01 100-120cm | 15,2708857 | 46,2306173 | -110 | ACME, 2019, ICP total dig | 0.125-0.063 | 29,1 | 63   | 1,24  | 552   | 0,282  | 5,87  | 0,727 | 1,61  | 2,2  | 35,8  | 19,4 | 3   | 9,1  | 0,04  | 16,9  | 55,6   | 6,8  | 24,5 | 4,6  | 1   |
| VP01 120-140cm | 15,2708857 | 46,2306173 | -130 | ACME, 2019, ICP total dig | 0.125-0.063 | 23,3 | 80   | 1,2   | 611   | 0,292  | 5,75  | 0,667 | 1,48  | 2,6  | 34,6  | 18,4 | 2   | 9,3  | 0,06  | 14,9  | 49,35  | 5,9  | 22,9 | 4,7  | 1   |
| VP02 0-20cm    | 15,3522975 | 46,2168017 | -10  | ACME, 2019, ICP total dig | 0.125-0.063 | 20,5 | 38   | 0,45  | 339   | 0,317  | 5,12  | 1,021 | 1,53  | 1,1  | 32,6  | 2,3  | 1   | 6,4  | 0,02  | 12,4  | 41,27  | 5,4  | 19,1 | 3,7  | 0,9 |
| VP02 20-40cm   | 15,3522975 | 46,2168017 | -30  | ACME, 2019, ICP total dig | 0.125-0.063 | 19,6 | 47   | 0,45  | 325   | 0,3    | 5,19  | 1,016 | 1,63  | 1,2  | 32,1  | 2,2  | 2   | 6,8  | 0,02  | 11,6  | 39,94  | 4,4  | 17,9 | 3,5  | 0,7 |
| VP02 40-60cm   | 15,3522975 | 46,2168017 | -50  | ACME, 2019, ICP total dig | 0.125-0.063 | 19,8 | 50   | 0,47  | 359   | 0,331  | 5,18  | 1,044 | 1,56  | 1,2  | 36,1  | 2,1  | 0,5 | 6,8  | 0,02  | 12    | 40,26  | 4,6  | 19,1 | 3,5  | 0,8 |
| VP02 60-80cm   | 15,3522975 | 46,2168017 | -70  | ACME, 2019, ICP total dig | 0.125-0.063 | 23,7 | 47,5 | 0,435 | 343,5 | 0,3375 | 4,715 | 1,017 | 1,665 | 1,3  | 32,75 | 2,2  | 1   | 6,15 | 0,055 | 11,95 | 44,905 | 5,95 | 20,8 | 4,25 | 0,8 |

Table S1. Continue

|                | LON        | LAT        | DEPTH (cm) | ANALYTICS                 | PARTICLE SIZE (mm) | Tb    | Dy    | Ho    | Er    | Tm    | Yb    | Lu    | Hf    | Li    | Rb     | Ta    | Nb    | Cs    | Ga     | In     | Re      | Se     | Te     | Tl    | Hg*   |
|----------------|------------|------------|------------|---------------------------|--------------------|-------|-------|-------|-------|-------|-------|-------|-------|-------|--------|-------|-------|-------|--------|--------|---------|--------|--------|-------|-------|
|                |            |            |            |                           |                    | mg/kg  | mg/kg | mg/kg | mg/kg | mg/kg  | mg/kg  | mg/kg   | mg/kg  | mg/kg  | mg/kg | mg/kg |
| S01 SS         | 14,6476474 | 46,4194598 | 0          | ACME, 2019, ICP total dig | < 0.063            | 0,3   | 1,7   | 0,3   | 0,8   | 0,1   | 0,7   | 0,05  | 0,72  | 44,7  | 97,9   | 0,5   | 7,66  | 5,1   | 16,58  | 0,05   | 0,001   | 0,4    | 2,87   | 0,57  | 0,22  |
| S02 SS         | 14,7274470 | 46,3795956 | 0          | ACME, 2019, ICP total dig | < 0.063            | 0,2   | 1,3   | 0,2   | 0,7   | 0,05  | 0,7   | 0,1   | 0,46  | 36,1  | 64,4   | 0,4   | 5,16  | 3,6   | 10,95  | 0,02   | 0,001   | 0,15   | 4,88   | 0,38  | 0,1   |
| S03 SS         | 14,7387350 | 46,3595111 | 0          | ACME, 2019, ICP total dig | < 0.063            | 0,3   | 1,8   | 0,3   | 0,6   | 0,05  | 0,7   | 0,05  | 0,51  | 40,3  | 75     | 0,4   | 5,85  | 4,2   | 12,73  | 0,08   | 0,006   | 0,4    | 4,17   | 0,44  | 0,13  |
| S04 SS         | 14,7488684 | 46,3552343 | 0          | ACME, 2019, ICP total dig | < 0.063            | 0,2   | 1,3   | 0,2   | 0,6   | 0,05  | 0,6   | 0,05  | 0,44  | 29,2  | 55,6   | 0,4   | 4,43  | 2,9   | 8,91   | 0,02   | 0,001   | 0,15   | 7,9    | 0,31  | 0,16  |
| S05 SS         | 14,8053260 | 46,3621756 | 0          | ACME, 2019, ICP total dig | < 0.063            | 0,2   | 1,8   | 0,3   | 0,8   | 0,1   | 1     | 0,2   | 0,67  | 33,3  | 64,4   | 0,4   | 5,06  | 3,4   | 9,9    | 0,02   | 0,001   | 0,6    | 4,43   | 0,34  | 0,1   |
| S06 SS         | 14,8343532 | 46,3397145 | 0          | ACME, 2019, ICP total dig | < 0.063            | 0,3   | 1,7   | 0,3   | 0,7   | 0,1   | 0,8   | 0,1   | 0,81  | 32,6  | 62     | 0,3   | 4,57  | 3,2   | 10,05  | 0,04   | 0,008   | 0,4    | 5,31   | 0,36  | 0,08  |
| S07 SS         | 14,8870108 | 46,3104630 | 0          | ACME, 2019, ICP total dig | < 0.063            | 0,3   | 1,8   | 0,3   | 0,8   | 0,1   | 1     | 0,2   | 0,86  | 32    | 66,7   | 0,4   | 5,47  | 3,5   | 11,06  | 0,02   | 0,004   | 0,15   | 5,85   | 0,36  | 0,08  |
| S08 SS         | 14,9254488 | 46,3128814 | 0          | ACME, 2019, ICP total dig | < 0.063            | 0,3   | 1,8   | 0,3   | 0,8   | 0,1   | 1,2   | 0,1   | 0,72  | 32,7  | 66,2   | 0,4   | 5,77  | 3,3   | 11,17  | 0,05   | 0,001   | 0,8    | 5,34   | 0,35  | 0,07  |
| S09 SS         | 14,9651475 | 46,3369110 | 0          | ACME, 2019, ICP total dig | < 0.063            | 0,6   | 4     | 0,8   | 2,4   | 0,4   | 2     | 0,3   | 2,3   | 30,7  | 102,2  | 0,7   | 10,02 | 6,8   | 15,7   | 0,05   | 0,001   | 1      | 1,4    | 0,74  | 0,2   |
| S10 SS         | 15,0172568 | 46,3172106 | 0          | ACME, 2019, ICP total dig | < 0.063            | 0,5   | 3,2   | 0,4   | 1,3   | 0,2   | 1,5   | 0,2   | 1,46  | 31,3  | 71,4   | 0,5   | 6,71  | 4     | 11,35  | 0,06   | 0,01    | 0,7    | 3,91   | 0,41  | 0,15  |
| S11 SS         | 15,0800962 | 46,2648267 | 0          | ACME, 2019, ICP total dig | < 0.063            | 0,5   | 3,3   | 2,4   | 2     | 0,2   | 1,6   | 0,3   | 1,27  | 32,8  | 72,4   | 0,7   | 8,96  | 4,4   | 11,2   | 0,04   | 0,004   | 0,6    | 3,21   | 0,41  | 0,1   |
| S12 SS         | 15,1413873 | 46,2385786 | 0          | ACME, 2019, ICP total dig | < 0.063            | 0,5   | 3,1   | 0,6   | 1,4   | 0,2   | 1,3   | 0,2   | 1,08  | 66,1  | 71,5   | 0,7   | 8,17  | 8,3   | 18,3   | 0,06   | 0,001   | 0,7    | 0,94   | 0,77  | 0,25  |
| S13 SS         | 15,2262118 | 46,2333114 | 0          | ACME, 2019, ICP total dig | < 0.063            | 0,5   | 3,9   | 0,6   | 1,7   | 0,2   | 1,5   | 0,3   | 1,23  | 60    | 73,4   | 0,7   | 8,99  | 9     | 19,12  | 0,07   | 0,001   | 0,7    | 0,73   | 0,86  | 0,24  |
| S14 SS         | 15,2665229 | 46,2243699 | 0          | ACME, 2019, ICP total dig | < 0.063            | 0,5   | 3     | 0,5   | 1,6   | 0,2   | 1,3   | 0,2   | 1,39  | 56,6  | 60     | 0,7   | 8,39  | 8,1   | 18,28  | 0,08   | 0,009   | 0,8    | 1,16   | 0,76  | 0,21  |
| S15 SS         | 15,2644737 | 46,2188428 | 0          | ACME, 2019, ICP total dig | < 0.063            | 0,5   | 3     | 0,6   | 1,5   | 0,2   | 1,7   | 0,2   | 1,43  | 45,3  | 81,4   | 0,7   | 9,53  | 5,2   | 13,12  | 0,07   | 0,006   | 1      | 1,38   | 0,62  | 0,08  |
| S16 SS         | 15,2380028 | 46,2017385 | 0          | ACME, 2019, ICP total dig | < 0.063            | 0,5   | 3     | 0,5   | 1,3   | 0,2   | 1,3   | 0,2   | 1,26  | 53,8  | 51,8   | 0,6   | 8,63  | 6,4   | 15,77  | 0,06   | 0,001   | 1,2    | 0,94   | 0,7   | 0,26  |
| S17 SS         | 15,2311504 | 46,1922087 | 0          | ACME, 2019, ICP total dig | < 0.063            | 0,5   | 3     | 0,6   | 1,6   | 0,2   | 1,4   | 0,2   | 1,2   | 61,9  | 80,5   | 0,6   | 8,37  | 8     | 17,55  | 0,05   | 0,001   | 0,4    | 0,89   | 0,76  | 0,17  |
| S18 SS         | 15,2333465 | 46,1642652 | 0          | ACME, 2019, ICP total dig | < 0.063            | 0,55  | 3,2   | 0,6   | 1,7   | 0,25  | 1,6   | 0,2   | 1,37  | 52,5  | 104,45 | 0,7   | 9,155 | 7,75  | 17,06  | 0,075  | 0,001   | 0,85   | 0,4575 | 0,71  | 0,2   |
| S19 SS         | 15,2391988 | 46,1464779 | 0          | ACME, 2019, ICP total dig | < 0.063            | 0,55  | 3,15  | 0,6   | 1,65  | 0,2   | 1,6   | 0,25  | 1,365 | 55,45 | 81,05  | 0,7   | 8,95  | 7,8   | 16,795 | 0,07   | 0,0015  | 0,85   | 0,2675 | 0,715 | 0,18  |
| S20 SS         | 15,1964927 | 46,1333611 | 0          | ACME, 2019, ICP total dig | < 0.063            | 0,5   | 2,6   | 0,5   | 1,4   | 0,2   | 1,4   | 0,2   | 1,15  | 40,6  | 77,9   | 0,5   | 7,23  | 5,1   | 12,2   | 0,04   | 0,001   | 0,5    | 2,59   | 0,52  | 0,1   |
| S21 SS         | 15,2109464 | 46,1213672 | 0          | ACME, 2019, ICP total dig | < 0.063            | 0,6   | 3,7   | 0,6   | 1,8   | 0,3   | 1,7   | 0,3   | 1,16  | 52,4  | 91,8   | 0,6   | 8,95  | 9,2   | 17,48  | 0,06   | 0,001   | 1,1    | 0,75   | 0,81  | 0,19  |
| S22 SS         | 15,2190421 | 46,1088638 | 0          | ACME, 2019, ICP total dig | < 0.063            | 0,55  | 3,35  | 0,55  | 1,65  | 0,2   | 1,5   | 0,25  | 1,285 | 48,3  | 99,6   | 0,6   | 8,275 | 7,95  | 15,95  | 0,06   | 0,001   | 1,3    | 1,365  | 0,685 | 0,14  |
| S23 SS         | 15,1896904 | 46,0893339 | 0          | ACME, 2019, ICP total dig | < 0.063            | 0,5   | 3     | 0,6   | 1,6   | 0,2   | 1,45  | 0,2   | 1,195 | 41,05 | 94,3   | 0,65  | 7,93  | 6,75  | 14,41  | 0,055  | 0,001   | 1,25   | 0,8825 | 0,615 | 0,135 |
| VO 01          | 15,2689241 | 46,2262241 | 0          | ACME, 2019, ICP total dig | < 0.063            | 0,5   | 3,1   | 0,5   | 1,5   | 0,2   | 1,3   | 0,2   | 1,27  | 50,4  | 72,3   | 0,6   | 8,99  | 4,6   | 13,06  | 0,11   | 0,001   | 1,2    | 1,77   | 0,68  | 0,09  |
| VO 02          | 15,2961213 | 46,2298470 | 0          | ACME, 2019, ICP total dig | < 0.063            | 0,6   | 3,2   | 0,85  | 1,85  | 0,3   | 1,65  | 0,2   | 1,865 | 29,15 | 77,95  | 0,65  | 7,72  | 4,85  | 11,135 | 0,09   | 0,002   | 0,85   | 0,84   | 0,52  | 0,1   |
| VO 03          | 15,3098684 | 46,2235666 | 0          | ACME, 2019, ICP total dig | < 0.063            | 0,53  | 3,33  | 0,6   | 1,6   | 0,2   | 1,467 | 0,2   | 1,6   | 35,37 | 82,4   | 0,73  | 9,493 | 5,167 | 13,437 | 0,0567 | 0,00167 | 0,7167 | 0,2567 | 0,563 | 0,185 |
| VO 04          | 15,3353340 | 46,2189141 | 0          | ACME, 2019, ICP total dig | < 0.063            | 0,8   | 4,5   | 0,7   | 1,6   | 0,2   | 1,5   | 0,3   | 1,39  | 24,2  | 64,5   | 0,8   | 10,58 | 3,7   | 11,19  | 0,04   | 0,001   | 1,4    | 0,61   | 0,42  | 0,04  |
| VO 05          | 15,3688911 | 46,2123988 | 0          | ACME, 2019, ICP total dig | < 0.063            | 0,5   | 3     | 0,5   | 1,2   | 0,2   | 1,5   | 0,2   | 1,25  | 29,7  | 66,2   | 0,7   | 8,77  | 3,9   | 11,88  | 0,06   | 0,001   | 1,1    | 0,79   | 0,46  | 0,05  |
| VO 06          | 15,4027925 | 46,2133318 | 0          | ACME, 2019, ICP total dig | < 0.063            | 0,7   | 3,8   | 0,6   | 1,4   | 0,2   | 1,5   | 0,2   | 1,22  | 24,3  | 63,8   | 0,8   | 10,69 | 3,5   | 11,41  | 0,05   | 0,003   | 1      | 0,41   | 0,44  | 0,03  |
| VO 07          | 15,4177292 | 46,1990553 | 0          | ACME, 2019, ICP total dig | < 0.063            | 0,65  | 3,25  | 0,55  | 1,5   | 0,2   | 1,4   | 0,2   | 1,43  | 20,2  | 64,3   | 0,85  | 10,66 | 2,65  | 10,33  | 0,02   | 0,001   | 0,475  | 0,1375 | 0,38  | 0,03  |
| SP01 0-20cm    | 15,2157203 | 46,2329958 | -10        | ACME, 2019, ICP total dig | < 0.063            | 0,6   | 3,2   | 0,7   | 1,9   | 0,3   | 1,8   | 0,3   | 1,66  | 42,5  | 86     | 0,6   | 7,78  | 5,6   | 13,19  | 0,09   | 0,001   | 0,8    | 0,89   | 0,57  | 0,14  |
| SP01 20-40cm   | 15,2157203 | 46,2329958 | -30        | ACME, 2019, ICP total dig | < 0.063            | 0,4   | 2,9   | 0,6   | 1,7   | 0,2   | 1,4   | 0,2   | 1,53  | 40,4  | 77,9   | 0,5   | 7,4   | 5     | 13,44  | 0,07   | 0,001   | 1,1    | 2,54   | 0,47  | 0,1   |
| SP01 40-60cm   | 15,2157203 | 46,2329958 | -50        | ACME, 2019, ICP total dig | < 0.063            | 0,4   | 3     | 0,5   | 1,7   | 0,2   | 1,8   | 0,3   | 1,45  | 40,2  | 70,1   | 0,5   | 7,25  | 4,7   | 12,76  | 0,07   | 0,001   | 0,6    | 3,82   | 0,47  | 0,08  |
| SP01 60-80cm   | 15,2157203 | 46,2329958 | -70        | ACME, 2019, ICP total dig | < 0.063            | 0,5   | 3     | 0,7   | 1,7   | 0,2   | 1,5   | 0,2   | 1,72  | 42,9  | 76     | 0,6   | 7,62  | 4,8   | 13,28  | 0,06   | 0,009   | 0,4    | 4,74   | 0,49  | 0,09  |
| SP01 80-100cm  | 15,2157203 | 46,2329958 | -90        | ACME, 2019, ICP total dig | < 0.063            | 0,6   | 3,2   | 0,6   | 1,5   | 0,2   | 1,6   | 0,2   | 1,83  | 39,7  | 73,5   | 0,6   | 7,26  | 4,6   | 12,25  | 0,04   | 0,001   | 1,1    | 3,75   | 0,52  | 0,1   |
| SP02 0-20cm    | 15,2399218 | 46,1970703 | -10        | ACME, 2019, ICP total dig | < 0.063            | 0,6   | 2,9   | 0,6   | 1,7   | 0,2   | 1,7   | 0,2   | 1,36  | 38,3  | 75,5   | 0,6   | 7,22  | 4,5   | 11,61  | 0,1    | 0,001   | 0,8    | 1,76   | 0,49  | 0,08  |
| SP02 20-40cm   | 15,2399218 | 46,1970703 | -30        | ACME, 2019, ICP total dig | < 0.063            | 0,5   | 2,9   | 0,6   | 1,6   | 0,2   | 1,7   | 0,2   | 1,51  | 44,8  | 92,9   | 0,6   | 7,61  | 6     | 13,5   | 0,05   | 0,001   | 0,8    | 2,45   | 0,59  | 0,11  |
| SP02 40-60cm   | 15,2399218 | 46,1970703 | -50        | ACME, 2019, ICP total dig | < 0.063            | 0,5   | 3,1   | 0,6   | 1,6   | 0,3   | 1,6   | 0,2   | 1,5   | 41    | 81,1   | 0,6   | 7,56  | 5,1   | 13,34  | 0,05   | 0,001   | 0,5    | 2,72   | 0,49  | 0,1   |
| SP02 60-80cm   | 15,2399218 | 46,1970703 | -70        | ACME, 2019, ICP total dig | < 0.063            | 0,6   | 3,4   | 0,6   | 1,8   | 0,3   | 1,6   | 0,3   | 1,57  | 43,9  | 89,9   | 0,6   | 8,6   | 5,6   | 13,69  | 0,07   | 0,001   | 0,8    | 1,75   | 0,67  | 0,23  |
| SP02 80-100cm  | 15,2399218 | 46,1970703 | -90        | ACME, 2019, ICP total dig | < 0.063            | 0,5   | 3,2   | 0,6   | 1,7   | 0,3   | 1,6   | 0,3   | 1,86  | 41,4  | 80,4   | 0,7   | 8,05  | 5,6   | 13,36  | 0,07   | 0,001   | 1,1    | 1,68   | 0,66  | 0,25  |
| SP02 100-120cm | 15,2399218 | 46,1970703 | -110       | ACME, 2019, ICP total dig | < 0.063            | 0,5   | 3,9   | 0,7   | 1,7   | 0,2   | 1,8   | 0,2   | 1,77  | 39,6  | 77,9   | 0,6   | 7,9   | 5,6   | 13,98  | 0,08   | 0,001   | 1,3    | 2,07   | 0,59  | 0,16  |
| SP02 120-140cm | 15,2399218 | 46,1970703 | -130       | ACME, 2019, ICP total dig | < 0.063            | 0,6   | 3,4   | 0,7   | 1,8   | 0,3   | 1,7   | 0,3   | 1,56  | 42,6  | 87,7   | 0,6   | 8,31  | 5,8   | 13,91  | 0,09   | 0,001   | 0,6    | 1,66   | 0,62  | 0,17  |
| VP01 0-20cm    | 15,2708857 | 46,2306173 | -10        | ACME, 2019, ICP total dig | < 0.063            | 0,6   | 3,6   | 0,6   | 1,7   | 0,2   | 1,6   | 0,2   | 1,09  | 38,1  | 85,7   | 0,7   | 9,19  | 5,1   | 13,47  | 0,31   | 0,001   | 1,2    | 1,1    | 0,83  | 0,38  |
| VP01 20-40cm   | 15,2708857 | 46,2306173 | -30        | ACME, 2019, ICP total dig | < 0.063            | 0,5   | 3,2   | 0,6   | 1,7   | 0,3   | 1,7   | 0,3   | 1,66  | 42    | 91,7   | 0,6   | 8,78  | 5,7   | 14,67  | 0,27   | 0,001   | 1,5    | 2,47   | 0,8   | 0,18  |
| VP01 40-60cm   | 15,2708857 | 46,2306173 | -50        | ACME, 2019, ICP total dig | < 0.063            | 0,6   | 3,6   | 0,7   | 1,7   | 0,3   | 1,9   | 0,3   | 1,4   | 42,1  | 97,4   | 0,7   | 9,49  | 6,3   | 15,68  | 1,8    | 0,001   | 0,8    | 1,12   | 0,82  | 0,18  |
| VP01 60-80cm   | 15,2708857 | 46,2306173 | -70        | ACME, 2019, ICP total dig | < 0.063            | 0,5   | 3,8   | 0,7   | 1,9   | 0,2   | 1,6   | 0,3   | 1,3   | 45,7  | 88,7   | 0,7   | 9,44  | 6,7   | 20,1   | 5,17   | 0,001   | 2,9    | 0,53   | 0,91  | 0,12  |
| VP01 80-100cm  | 15,2708857 | 46,2306173 | -90        | ACME, 2019, ICP total dig | < 0.063            | 0,6   | 3,5   | 0,7   | 2     | 0,3   | 1,7   | 0,3   | 1,34  | 45,7  | 104,5  | 0,7   | 9,94  | 7,1   | 18,88  | 4,67   |         |        |        |       |       |

|                |            |            |      |                           |             |      |      |     |      |      |     |      |     |       |       |       |     |       |      |       |       |       |      |        |      |
|----------------|------------|------------|------|---------------------------|-------------|------|------|-----|------|------|-----|------|-----|-------|-------|-------|-----|-------|------|-------|-------|-------|------|--------|------|
| S20 SS         | 15,1964927 | 46,1333611 | 0    | ACME, 2019, ICP total dig | 0.125-0.063 | 3,1  | 0,4  | 2,7 | 0,5  | 1,4  | 0,2 | 1,3  | 0,2 | 0,92  | 29,4  | 64,8  | 0,5 | 6,4   | 3,8  | 9,35  | 0,04  | 0,001 | 0,9  | 2,86   | 0,38 |
| S21 SS         | 15,2109464 | 46,1213672 | 0    | ACME, 2019, ICP total dig | 0.125-0.063 | 4,3  | 0,6  | 3,7 | 0,7  | 1,9  | 0,3 | 1,7  | 0,2 | 1,32  | 51,1  | 111,1 | 0,6 | 8,46  | 9    | 16,63 | 0,08  | 0,001 | 0,7  | 0,93   | 0,75 |
| S22 SS         | 15,2190421 | 46,1088638 | 0    | ACME, 2019, ICP total dig | 0.125-0.063 | 3,9  | 0,4  | 2,8 | 0,5  | 1,6  | 0,2 | 1,3  | 0,2 | 1,21  | 39,8  | 89,4  | 0,6 | 6,9   | 7    | 13,96 | 0,06  | 0,001 | 1,3  | 2,67   | 0,6  |
| S23 SS         | 15,1896904 | 46,0893339 | 0    | ACME, 2019, ICP total dig | 0.125-0.063 | 2,7  | 0,4  | 2,5 | 0,5  | 1,2  | 0,2 | 1,2  | 0,2 | 0,87  | 30,8  | 72,2  | 0,5 | 6,37  | 4,6  | 10,46 | 0,05  | 0,001 | 0,6  | 2,14   | 0,44 |
| VO 01          | 15,2689241 | 46,2262241 | 0    | ACME, 2019, ICP total dig | 0.125-0.063 | 2,8  | 0,4  | 2,4 | 0,5  | 1,3  | 0,2 | 1,5  | 0,2 | 1,08  | 44,8  | 60    | 0,6 | 7,75  | 3,5  | 9,32  | 0,06  | 0,001 | 1    | 2,11   | 0,53 |
| VO 02          | 15,2961213 | 46,2298470 | 0    | ACME, 2019, ICP total dig | 0.125-0.063 | 3,8  | 0,5  | 2,7 | 0,5  | 1,5  | 0,3 | 1,6  | 0,2 | 1,23  | 20    | 72,5  | 0,7 | 8,39  | 3,7  | 10,14 | 0,04  | 0,001 | 0,4  | 0,24   | 0,46 |
| VO 03          | 15,3098684 | 46,2235666 | 0    | ACME, 2019, ICP total dig | 0.125-0.063 | 3,1  | 0,4  | 2,3 | 0,5  | 1,3  | 0,2 | 1,3  | 0,2 | 1     | 25,1  | 76,6  | 0,6 | 7,84  | 4    | 11,15 | 0,04  | 0,002 | 0,3  | 0,6    | 0,48 |
| VO 04          | 15,3353340 | 46,2189141 | 0    | ACME, 2019, ICP total dig | 0.125-0.063 | 3,6  | 0,5  | 2,5 | 0,5  | 1,4  | 0,2 | 1,3  | 0,2 | 0,93  | 16,7  | 57,9  | 0,7 | 9,22  | 2,6  | 9,13  | 0,03  | 0,001 | 0,8  | 0,49   | 0,34 |
| VO 05          | 15,3688911 | 46,2123988 | 0    | ACME, 2019, ICP total dig | 0.125-0.063 | 2,8  | 0,3  | 1,9 | 0,3  | 1,1  | 0,1 | 1,1  | 0,2 | 0,86  | 20,1  | 64,4  | 0,5 | 6,75  | 3,1  | 9,57  | 0,02  | 0,001 | 1,1  | 0,52   | 0,43 |
| VO 06          | 15,4027925 | 46,2133318 | 0    | ACME, 2019, ICP total dig | 0.125-0.063 | 2,4  | 0,2  | 1,9 | 0,4  | 1    | 0,2 | 1,2  | 0,2 | 0,7   | 17,6  | 53,8  | 0,6 | 7,83  | 2,1  | 8,05  | 0,03  | 0,001 | 0,4  | 0,28   | 0,35 |
| VO 07          | 15,4177292 | 46,1990553 | 0    | ACME, 2019, ICP total dig | 0.125-0.063 | 2,5  | 0,3  | 1,7 | 0,4  | 1,1  | 0,1 | 0,9  | 0,1 | 0,75  | 17,3  | 61,4  | 0,5 | 7,12  | 2,3  | 8,56  | 0,02  | 0,001 | 1,1  | 0,27   | 0,39 |
| SP01 0-20cm    | 15,2157203 | 46,2329958 | -10  | ACME, 2019, ICP total dig | 0.125-0.063 | 3,5  | 0,5  | 2,9 | 0,7  | 1,8  | 0,3 | 1,7  | 0,3 | 1,7   | 34    | 70    | 0,5 | 6,85  | 4,4  | 11,8  | 0,08  | 0,001 | 0,3  | 1,61   | 0,43 |
| SP01 20-40cm   | 15,2157203 | 46,2329958 | -30  | ACME, 2019, ICP total dig | 0.125-0.063 | 3,4  | 0,4  | 3,1 | 0,5  | 1,5  | 0,2 | 1,7  | 0,3 | 1,4   | 38,2  | 70,5  | 0,5 | 6,88  | 4,4  | 12,22 | 0,06  | 0,001 | 0,6  | 3,13   | 0,43 |
| SP01 40-60cm   | 15,2157203 | 46,2329958 | -50  | ACME, 2019, ICP total dig | 0.125-0.063 | 3,5  | 0,4  | 2,4 | 0,6  | 1,7  | 0,2 | 1,4  | 0,2 | 1,48  | 34,4  | 65,2  | 0,5 | 6,8   | 4    | 11,75 | 0,04  | 0,001 | 0,6  | 4,22   | 0,39 |
| SP01 60-80cm   | 15,2157203 | 46,2329958 | -70  | ACME, 2019, ICP total dig | 0.125-0.063 | 3,2  | 0,4  | 3   | 0,5  | 2,5  | 0,2 | 1,7  | 0,2 | 1,53  | 35,6  | 64,5  | 0,5 | 6,72  | 3,9  | 10,82 | 0,04  | 0,008 | 0,7  | 4,16   | 0,4  |
| SP01 80-100cm  | 15,2157203 | 46,2329958 | -90  | ACME, 2019, ICP total dig | 0.125-0.063 | 3,7  | 0,5  | 2,6 | 0,6  | 1,6  | 0,2 | 1,7  | 0,2 | 1,36  | 32,2  | 57,2  | 0,5 | 6,39  | 3,3  | 10,11 | 0,04  | 0,007 | 0,6  | 5,54   | 0,38 |
| SP02 0-20cm    | 15,2399218 | 46,1970703 | -10  | ACME, 2019, ICP total dig | 0.125-0.063 | 3,2  | 0,5  | 2,7 | 0,5  | 1,5  | 0,3 | 1,5  | 0,3 | 1,42  | 32,3  | 69,9  | 0,5 | 6,75  | 3,8  | 11,31 | 0,05  | 0,001 | 0,4  | 2,51   | 0,46 |
| SP02 20-40cm   | 15,2399218 | 46,1970703 | -30  | ACME, 2019, ICP total dig | 0.125-0.063 | 3,4  | 0,4  | 2,9 | 0,6  | 1,5  | 0,2 | 1,6  | 0,2 | 1,34  | 39,4  | 75,4  | 0,5 | 7,07  | 4,6  | 12,14 | 0,06  | 0,001 | 0,5  | 2,37   | 0,47 |
| SP02 40-60cm   | 15,2399218 | 46,1970703 | -50  | ACME, 2019, ICP total dig | 0.125-0.063 | 3,8  | 0,4  | 2,9 | 0,6  | 1,7  | 0,3 | 1,8  | 0,2 | 1,43  | 33,4  | 67,5  | 0,5 | 6,78  | 3,8  | 11,11 | 0,04  | 0,002 | 0,7  | 2,49   | 0,39 |
| SP02 60-80cm   | 15,2399218 | 46,1970703 | -70  | ACME, 2019, ICP total dig | 0.125-0.063 | 3,6  | 0,45 | 3   | 0,6  | 1,65 | 0,2 | 1,65 | 0,2 | 1,29  | 32,2  | 70,15 | 0,6 | 7,705 | 3,95 | 11,24 | 0,055 | 0,001 | 0,85 | 1,1475 | 0,49 |
| SP02 80-100cm  | 15,2399218 | 46,1970703 | -90  | ACME, 2019, ICP total dig | 0.125-0.063 | 4,1  | 0,4  | 2,6 | 0,6  | 1,7  | 0,2 | 1,5  | 0,3 | 1,47  | 34,2  | 66,5  | 0,6 | 7,19  | 4,4  | 11,18 | 0,07  | 0,001 | 0,9  | 2,94   | 0,54 |
| SP02 100-120cm | 15,2399218 | 46,1970703 | -110 | ACME, 2019, ICP total dig | 0.125-0.063 | 3,6  | 0,4  | 2,7 | 0,5  | 1,6  | 0,2 | 1,6  | 0,2 | 1,71  | 31,3  | 64,9  | 0,6 | 7,19  | 4,3  | 11,65 | 0,09  | 0,001 | 0,9  | 2,78   | 0,47 |
| SP02 120-140cm | 15,2399218 | 46,1970703 | -130 | ACME, 2019, ICP total dig | 0.125-0.063 | 3,6  | 0,5  | 3,4 | 0,6  | 1,7  | 0,3 | 1,7  | 0,3 | 1,36  | 36,6  | 74,7  | 0,6 | 7,56  | 4,6  | 11,41 | 0,08  | 0,001 | 0,7  | 2,76   | 0,51 |
| VP01 0-20cm    | 15,2708857 | 46,2306173 | -10  | ACME, 2019, ICP total dig | 0.125-0.063 | 3,6  | 0,5  | 2,8 | 0,5  | 1,6  | 0,2 | 1,5  | 0,2 | 0,89  | 31,2  | 69,1  | 0,6 | 7,99  | 3,7  | 11,19 | 0,22  | 0,003 | 0,6  | 1,51   | 0,67 |
| VP01 20-40cm   | 15,2708857 | 46,2306173 | -30  | ACME, 2019, ICP total dig | 0.125-0.063 | 4    | 0,4  | 2,9 | 0,5  | 1,5  | 0,2 | 1,5  | 0,2 | 1,42  | 32,3  | 73,8  | 0,6 | 7,64  | 4,4  | 12,28 | 0,22  | 0,003 | 0,9  | 2,42   | 0,61 |
| VP01 40-60cm   | 15,2708857 | 46,2306173 | -50  | ACME, 2019, ICP total dig | 0.125-0.063 | 3,8  | 0,5  | 2,8 | 0,6  | 1,6  | 0,2 | 1,5  | 0,3 | 1,27  | 36,1  | 78,8  | 0,6 | 8,01  | 4,9  | 13,25 | 1,31  | 0,001 | 0,8  | 1,22   | 0,66 |
| VP01 60-80cm   | 15,2708857 | 46,2306173 | -70  | ACME, 2019, ICP total dig | 0.125-0.063 | 4,7  | 0,5  | 3,4 | 0,6  | 1,7  | 0,2 | 1,4  | 0,2 | 1,15  | 36,3  | 78,9  | 0,6 | 8,25  | 5,7  | 16,95 | 3,95  | 0,001 | 2,6  | 0,55   | 0,77 |
| VP01 80-100cm  | 15,2708857 | 46,2306173 | -90  | ACME, 2019, ICP total dig | 0.125-0.063 | 3,8  | 0,5  | 3,1 | 0,7  | 1,8  | 0,2 | 1,6  | 0,3 | 1,11  | 37,1  | 90,6  | 0,7 | 8,62  | 5,9  | 17,02 | 3,99  | 0,001 | 1,1  | 0,76   | 0,76 |
| VP01 100-120cm | 15,2708857 | 46,2306173 | -110 | ACME, 2019, ICP total dig | 0.125-0.063 | 4,3  | 0,5  | 3,4 | 0,6  | 1,7  | 0,3 | 1,7  | 0,2 | 1,04  | 40    | 94,2  | 0,6 | 8,81  | 6,2  | 16,33 | 3,42  | 0,001 | 1,3  | 0,39   | 0,8  |
| VP01 120-140cm | 15,2708857 | 46,2306173 | -130 | ACME, 2019, ICP total dig | 0.125-0.063 | 4    | 0,5  | 3,2 | 0,7  | 1,6  | 0,2 | 1,4  | 0,2 | 1,09  | 39,1  | 75,7  | 0,6 | 7,85  | 5,9  | 17,01 | 3,9   | 0,002 | 2,4  | 0,61   | 0,81 |
| VP02 0-20cm    | 15,3522975 | 46,2168017 | -10  | ACME, 2019, ICP total dig | 0.125-0.063 | 3,2  | 0,4  | 2,8 | 0,5  | 1,5  | 0,2 | 1,3  | 0,2 | 0,95  | 24,9  | 73,2  | 0,6 | 7,82  | 3,9  | 11,49 | 0,03  | 0,001 | 0,6  | 0,51   | 0,49 |
| VP02 20-40cm   | 15,3522975 | 46,2168017 | -30  | ACME, 2019, ICP total dig | 0.125-0.063 | 3    | 0,4  | 2,3 | 0,4  | 1,3  | 0,2 | 1,4  | 0,1 | 0,98  | 26,3  | 72,7  | 0,6 | 7,12  | 3,8  | 10,92 | 0,04  | 0,001 | 0,4  | 0,2    | 0,5  |
| VP02 40-60cm   | 15,3522975 | 46,2168017 | -50  | ACME, 2019, ICP total dig | 0.125-0.063 | 3,2  | 0,3  | 2,6 | 0,5  | 1,3  | 0,2 | 1,4  | 0,2 | 1,05  | 25,2  | 77,4  | 0,7 | 8,34  | 4,1  | 11,69 | 0,03  | 0,001 | 0,9  | 0,28   | 0,5  |
| VP02 60-80cm   | 15,3522975 | 46,2168017 | -70  | ACME, 2019, ICP total dig | 0.125-0.063 | 3,45 | 0,5  | 2,4 | 0,45 | 1,5  | 0,2 | 1,35 | 0,2 | 1,045 | 25,45 | 66,3  | 0,6 | 7,865 | 3,75 | 10,92 | 0,055 | 0,001 | 0,65 | 0,11   | 0,55 |

\* Hg was analysed using aqua regia digestion
